1  
2  
3  
4 A meta-analysis of *Entamoeba histolytica/dispar* in Iraq  
5

6  
7 Khder Niazi Chalabi\*  
8

9  
10  
11 Department of Biology, College of Education, Salahaddin University-Erbil, Erbil, Iraq  
12  
13

14 \* Corresponding author

15 E-mail: [khderniazi@yahoo.com](mailto:khderniazi@yahoo.com) (KC)  
16  
17  
18  
19  
20  
21  
22  
23

## Abstract

## Background

Amebiasis is a major health problem caused by the protozoan parasite *Entamoeba histolytica* with a worldwide distribution, especially in developing countries. The aim of this systematic review and meta-analysis was to estimate the proportion prevalence of *E. histolytica/dispar* in human in Iraq.

## Methodology/Principal Findings

Published studies on human infection with *E. histolytica/dispar* in Iraq were searched in electronic databases using Google scholar, Iraqi Academic Scientific Journals (IASJ), PubMed, ScienceDirect and WHO Global Health Library (GHL). Eligible studies were cross-sectional and used fecal and/or serological methods to diagnose *E. histolytica/dispar* infection in human in Iraq, and published between 1970 and July 2017. The pooled prevalence was calculated using random effect model meta-analyses with 95% confidence interval (CI). Ninety nine studies were eligible for the meta-analysis that included 117694 individuals. The pooled proportion for *E. histolytica/dispar* infection in Iraq was estimated at 20.61% with a 95% confidence interval (CI) of 17.83, 23.53. A high level of heterogeneity was found among the studies. The prevalence among Iraqi population ranged between 1.66 and 90.5% per study (mean: 22.36%). The pooled prevalence of infection was 58.43% (95% CI: 54.71%–62.1%) and 43.10% (95% CI: 39.66%–46.6%) for males and females respectively. Parasite screening using microscopy did not differentiate between the pathogenic and nonpathogenic species of *Entamoeba* resulted in higher proportion prevalence than PCR proportion prevalence, (20.32%, 95% CI: 17.80%–22.96%) (17.57%, 95% CI: 8.07%–29.75%) respectively. Hospital based studies recorded the highest prevalence of *E. histolytica/dispar* infection at 22.69% (95% CI: 19.55%–25.99%). The prevalence decreased into 18.46 (95% CI: 14.28%–23.04%) between 2010 and 2017.

## Conclusions/Significance

Although there was a reduction in prevalence of amebiasis since 2010, the prevalence of amebiasis is still considerable in population of Iraq. Therefore, prevention strategies of fecal contamination are required to reduce the infection.

51

## 52 **Author summary**

53 Amebiasis is the infection with *Entamoeba histolytica* an invasive parasite dwelling the intestine or  
54 other organs such as liver, lungs, or skin of human. Infection with this parasite could be acquired by  
55 consumption of contaminated water, vegetables, and fruits with feces of infected human. The infection may  
56 be asymptomatic or symptomatic causing dysentery. We performed this meta-analysis to estimate the  
57 prevalence of amebiasis in the population of Iraq between 1970 and 2017. Ninety nine published studies were  
58 identified and the data were extracted from them to use in our meta-analysis and the total included individuals  
59 were 117694. The prevalence of population infection in Iraq was evaluated at 20.61%. The infection  
60 prevalence was higher in males than in females. The infection prevalence decreased during the period 2010 to  
61 2017 in Iraqi population. This level of infection needs further efforts to eradicate amebiasis, these efforts begin  
62 with the prevention of the disease transmission through water and food and treatment of infected people. So  
63 awareness of simple hygienic principles can control the disease by boiling water and washing vegetables and  
64 fruits thoroughly.

65

## 66 **Introduction**

67 Amebiasis is a human infection caused by the intestinal protozoan parasite *Entamoeba histolytica*, with  
68 a cosmopolitan distribution. It is considered as third parasitic cause of human mortality after malaria and  
69 schistosomiasis, especially in developing countries with poor sanitations. The infection with amebiasis is  
70 estimated to be more than 50 million cases throughout the world and 40,000–110,000 deaths annually [1,2].  
71 *E. histolytica* is endemic in most tropical and subtropical countries [3]. Infection with amebiasis can be  
72 intestinal and extraintestinal especially in liver; intestinal amebiasis varies widely from asymptomatic  
73 infection to dysentery [4]. The common route for infection of the host with amebiasis is by the ingestion of *E.*  
74 *histolytica* cysts in water or food, which are contaminated with feces [5]. *E. histolytica* has been reclassified  
75 into *Entamoeba* complex that include pathogenic *E. histolytica* and two nonpathogenic species (*E. dispar* and  
76 *E. moshkovskii*), the three species are morphologically indistinguishable [6].

To our knowledge, there is no study which has determined the overall prevalence of *E. histolytica* infection of human in Iraq. Therefore, the objectives of this study were to determine the prevalence of *E. histolytica* infection and related data (age, sex and study setting) of humans in Iraq, by using meta-analytical methods. The data of the current study can be used to eliminate or reduce the human infection with amebiasis in Iraq through providing more targeted programs for prevention and control.

## Methods

The study was conducted based on the PRISMA guideline (Preferred Reporting Items for Systematic Reviews and Meta-Analyses) [7]. The PRISMA checklist was used to ensure inclusion of relevant information in the analysis (S1 Checklist).

### Search strategy

The literature search was conducted in the following electronic databases: Google scholar, Iraqi Academic Scientific Journals (IASJ), PubMed, ScienceDirect and WHO Global Health Library (GHL). The electronic search was limited to studies published in English or Arabic between 1970 and July 2017.

For searching, Boolean operators OR and/or AND were used for combination of terms. The following terms were used in the electronic database search: “amebiasis”, “amoebiasis”, “Entamoeba histolytica”, “Entamoeba dispar”, “Iraq”, “human”, “prevalence” and “Infection”.

### Study selection

The process of study selection was performed by identifying relevant publications about human amebiasis in Iraq. The selection of articles was based on their titles and then their abstracts, which were relevant to the outcomes of interest. The search results were imported into Mendeley, for management of articles, to exclude duplicate publications. Then articles were screened, they were excluded if did not meet the eligibility criteria. A study was eligible if it fulfilled the following eligibility criteria: (i) full text and published in English or Arabic; (ii) cross-sectional; (iii) carried out on humans; (iv) conducted in Iraq; (v) used

103 coprological and/or serological methods for diagnosis; (vi) sample size > 35; (vii) clarity of results. If more  
104 than one study presented the same data, the study with data that are more complete were included.

## 106 **Data extraction**

107 From each study included, the following data were extracted: the first author, year of publication, year  
108 of study, province, method of detection, sample size, positive samples, prevalence, sex, age group and study  
109 setting.

110 If the data values were not clearly mentioned in the text, the information was extracted from available  
111 data tables.

## 113 **Data analysis**

114 Proportion meta-analyses had been conducted for data analysis. For each study, the proportions of the  
115 prevalence of amebiasis were calculated, and then the pooled proportions were derived with 95% confidence  
116 intervals (CIs). Freeman-Tukey transformation (arcsine square root transformation) was used for calculation  
117 of the weighted summary proportion for the random effects model (DerSimonian and Laird).

118 If a study did not record the year of data collection, the year of publication was used as the year of data  
119 collection. If detailed data were available, we stratified the prevalence of amebiasis by sex (male and female),  
120 by method of detection (Microscopy and PCR), by setting (hospital, hospital/primary schools pupils, primary  
121 school pupils, foodhandlers, village and nursery schools/children from some houses), by Year of study (less  
122 than 1990, 1990-1999, 2000-2009 and 2010-2018) and by province (Al-Anbar, Al-Najaf, Babylon, Baghdad,  
123 Basrah, Diwaniya, Diyala, Duhok, Erbil, Karbala, Kirkuk, Ninevah, Saladin, Sulaimani, Thi-Qar and Wasit).

124 Data analysis was performed using MedCalc Statistical Software (version 17.9.2) (MedCalc Software  
125 bvba, Ostend, Belgium; <http://www.medcalc.org>; 2017) and Microsoft Office Excel 2013.

126 Forest plot was generated to display the results of each study and the heterogeneity among studies.  
127 Heterogeneity between studies was assessed by the Cochran's Q test and inverse variance index ( $I^2$ ). The  $I^2$   
128 index indicates that the variation between studies that is due to heterogeneity rather than chance.  $I^2$  values

greater than 75% were considered as high heterogeneity [8]. A funnel plot was used to visually investigate the across study bias.

## Results

### Study selection

A total of 164 studies were found of which 16 were duplicates and were excluded, resulting in 148 records (Fig 1). After screening the title and abstract of 148 records, 17 records were excluded because the abstracts and the full-texts of eight and nine studies were not accessible, respectively. Out of 131 full-text reports were assessed for eligibility, 32 were excluded because: 2 studies did not use coprological and/or serological methods for diagnosis of amebiasis; 2 studies had the same data by the same author; 4 studies were not epidemiological; 2 studies presented the data of infection with amebiasis as a combined infection with other parasite; 19 studies did not provide data of prevalence; 2 studies were conducted on the samples of fingernails; 1 study was carried out on infectious agents in stool samples of children with nosocomial diarrhea. Finally, 99 entries were included in the meta-analysis [9-107].

### Fig 1. Flow diagram of study selection process for meta-analysis.

### Study characteristics

Table 1 shows the characteristics of the studies included in the meta-analysis, which covered 16 provinces in Iraq. The studies included 24383 positive cases out of 117694 individuals. Most of the studies used microscopy method (95 studies) followed by PCR method (3 studies) for detection of *E. histolytica/dispar* in stool, one study did not mention the method. There was no study used serological methods for detection of *E. histolytica/dispar*. The studies have been carried out from 1988 to 2016 and published between 1999 and 2017. The studies included in the meta-analyses were undertaken in subjects of all ages, ranging from less than 1 year to 90 years, 47 studies included only children and 45 studies included both children and adults, seven studies did not specify the age groups. The sample sizes of the eligible studies ranged from 70 to 18450. The prevalence of infection with *E. histolytica/dispar* ranged from 1.66 to 90.5%

156 (mean: 22.36%). In the selected articles, 84 studies were hospital based, 3 studies were conducted in  
 157 individuals from hospitals / primary schools, 3 studies in pupils of primary schools, 3 studies in foodhandlers,  
 158 2 studies in individuals from villages, 1 study in children from nursery schools / some houses, 3 studies did  
 159 not specify the sources of stool samples.

160

161 **Table 1. Characteristics of studies included in the meta-analysis.**

| First author | Year of publication | Year of study | Province | Detection method in stool | Sample size | Positive cases | Prevalence % | Male No (%) | Female No (%) | Age in years | Study setting              |
|--------------|---------------------|---------------|----------|---------------------------|-------------|----------------|--------------|-------------|---------------|--------------|----------------------------|
| Al-Mosawi    | 2016                | 2015          | Thi-Qar  | Microscopy                | 200         | 35             | 17.5         |             |               |              | hospital                   |
| Al-Sorchee   | 2013                | 2007          | Erbil    | Microscopy                | 500         | 175            | 35           |             |               | 1-10         | hospital                   |
| Rabatti      | 2008                | 2002          | Erbil    | Microscopy                | 116         | 70             | 60.34        |             |               | 0-12         | hospital                   |
| Khudair      | 2011                | 2008-2009     | Diyala   | Microscopy                | 975         | 93             | 9.54         |             |               | 0-10         | hospital                   |
| Nasser       | 2014                | 2013-2014     | Wasit    | Microscopy                | 596         | 100            | 16.78        |             |               | <5->46       | hospital                   |
| Ali          | 2015                | 2013-2014     | Babylon  | Microscopy                | 492         | 115            | 23.37        |             |               | 0-<30        | hospital                   |
| Al-Ammash    | 2015                | 2014-2015     | Saladin  | Microscopy                | 304         | 55             | 18.09        | 35 (63.64)  | 20 (36.36)    | 0-50         | hospital                   |
| Muhsin       | 2016                | 2012          | Karbala  | Microscopy                | 5670        | 332            | 5.86         | 193 (58.13) | 139 (41.87)   | <12          | hospital                   |
| Mahfoth      | 2010                | 2007-2008     | Ninevah  | Microscopy                | 1220        | 347            | 28.44        |             |               | <5           | nursery schools / children |

|                  |      |                   |          |            |       |      |       |                 |                 |                 |                             |
|------------------|------|-------------------|----------|------------|-------|------|-------|-----------------|-----------------|-----------------|-----------------------------|
|                  |      |                   |          |            |       |      |       |                 |                 |                 | from<br>some<br>houses      |
| Hussein          | 2011 | 2009              | Baghdad  | Microscopy | 730   | 103  | 14.11 | 40<br>(38.83)   | 63<br>(61.17)   | 0-18            | hospital                    |
| Al-Fahdawi       | 2007 | 2004<br>-<br>2005 | Al-Anbar | Microscopy | 896   | 237  | 26.45 | 120<br>(50.63)  | 117<br>(49.37)  | 1-71            | hospital                    |
| Jamil            | 2008 | 2006              | Diyala   | Microscopy | 220   | 155  | 70.45 |                 |                 | <1->41          | hospital                    |
| Al-Zigibi<br>(a) | 2011 | 2009<br>-<br>2010 | Karbala  | Microscopy | 776   | 61   | 7.86  | 29<br>(47.54)   | 32<br>(52.46)   | 0-70            | hospital                    |
| Al-Jeburi        | 2010 | 2007<br>-<br>2008 | Diyala   | Microscopy | 161   | 43   | 26.71 | 23<br>(53.49)   | 20<br>(46.51)   | <1-70           | hospital                    |
| Al-Zigibi<br>(b) | 2011 |                   | Babylon  | Microscopy | 250   | 34   | 13.6  | 19<br>(55.88)   | 15<br>(44.12)   |                 | primary<br>school<br>pupils |
| AL-Aboody        | 2010 | 2009              | Thi-Qar  | Microscopy | 1000  | 249  | 24.9  |                 |                 | 1->16           | hospital                    |
| Moham<br>med     | 2010 | 2008              | Thi-Qar  | Microscopy | 960   | 392  | 40.83 | 210<br>(53.57)  | 182<br>(46.43)  | <10-><br>51     | hospital                    |
| Al-Tae           | 2008 | 2000<br>-<br>2001 | Baghdad  | Microscopy | 354   | 103  | 29.10 |                 |                 | 1->70           | hospital                    |
| Al-Azzawi        | 2010 | 2009              | Diyala   | Microscopy | 18450 | 2640 | 14.31 | 1490<br>(56.44) | 1150<br>(43.56) | 0-15            | hospital                    |
| Jasim            | 2009 | 2001              | Saladin  | Microscopy | 133   | 57   | 42.86 |                 |                 | 0-5             | hospital                    |
| Al-Kaisi         | 2007 | 2002              | Saladin  | Microscopy | 1050  | 140  | 13.33 | 82<br>(58.57)   | 58<br>(41.43)   | 0-81            | hospital                    |
| Saael            | 2009 | 2005              | Baghdad  | Microscopy | 1268  | 394  | 31.07 | 204<br>(51.78)  | 190<br>(48.22)  | 1-12            | hospital                    |
| Al-Warid         | 2012 | 2009<br>-<br>2010 | Baghdad  | Microscopy | 737   | 27   | 3.66  |                 |                 | various<br>ages | hospital                    |



|                 |      |                   |          |            |     |     |       |                |                |                 |                             |
|-----------------|------|-------------------|----------|------------|-----|-----|-------|----------------|----------------|-----------------|-----------------------------|
| Al-Tikrity      | 2009 | 2006<br>-<br>2007 | Saladin  | Microscopy | 218 | 154 | 70.64 | 78<br>(50.65)  | 76<br>(49.35)  | 1->25           | hospital                    |
| Al-Marzoqi      | 2008 | 2008              | Babylon  | Microscopy | 173 | 40  | 23.12 |                |                | <1              | hospital                    |
| Al-Mosa         | 2007 | 2004<br>-<br>2005 | Babylon  | Microscopy | 540 | 91  | 16.85 |                |                | various<br>ages | hospital                    |
| Ftohe           | 2008 | 2005<br>-<br>2006 | Ninevah  | Microscopy | 600 | 139 | 23.17 | 82<br>(58.99)  | 57<br>(41.01)  | <6              | hospital                    |
| Nayyef          | 2011 | 2008              | Baghdad  | Microscopy | 800 | 317 | 39.63 | 163<br>(51.42) | 154<br>(48.58) | 0-90            | hospital                    |
| Al-Taie         | 2006 | 2003<br>-<br>2004 | Babylon  | Microscopy | 865 | 146 | 16.88 |                |                | 1->50           | hospital                    |
| Abdullah<br>(a) | 2005 | 1998<br>-<br>1999 | Kirkuk   | Microscopy | 806 | 75  | 9.31  |                |                | 6-13            | primary<br>school<br>pupils |
| Abdullah<br>(b) | 2005 | 1998<br>-<br>1999 | Kirkuk   | Microscopy | 325 | 12  | 3.69  | 325            |                | 9-79            | foodhan<br>dlers            |
| Saeed           | 2005 |                   | Ninevah  | Microscopy | 754 | 67  | 8.89  |                |                | 1-69            | hospital                    |
| Jaaffer         | 2011 | 2009<br>-<br>2010 | Baghdad  | Microscopy | 513 | 15  | 2.92  | 7<br>(46.67)   | 8<br>(53.33)   | 0-12            | hospital                    |
| Thhaib          | 2008 | 2005<br>-<br>2006 | Diwaniya | Microscopy | 75  | 8   | 10.67 |                |                | 0-2             | hospital                    |
| Al-Yasari       | 2009 | 2008              | Babylon  | Microscopy | 115 | 6   | 5.22  |                |                | 5-50            | hospital                    |
| Al-Morshidy     | 2007 | 2003<br>-<br>2004 | Babylon  | Microscopy | 243 | 68  | 27.98 |                |                |                 | hospital                    |
| Yousif          | 2011 |                   | Baghdad  | Microscopy | 722 | 12  | 1.66  |                |                | 1->18           |                             |

|             |      |                   |          |            |      |      |       |                |                |                 |                                               |
|-------------|------|-------------------|----------|------------|------|------|-------|----------------|----------------|-----------------|-----------------------------------------------|
| Ibraheem    | 2010 | 2007<br>-<br>2008 | Baghdad  | Microscopy | 316  | 64   | 20.25 |                |                | 0-10            | hospital                                      |
| Al-Reikaby  | 2010 | 2007              | Thi-Qar  |            | 4006 | 2470 | 61.66 |                |                | <1->45          | hospital                                      |
| Al-Kubaisy  | 2008 | 2006<br>-<br>2007 | Babylon  | Microscopy | 1224 | 222  | 18.14 | 135<br>(60.81) | 87<br>(39.19)  | <1->45          | hospital                                      |
| Kadhum      | 2011 | 2009<br>-<br>2010 | Al-Najaf | Microscopy | 70   | 3    | 4.29  |                |                | <1              | hospital                                      |
| Al-Najar    | 2006 | 2001              | Baghdad  | Microscopy | 125  | 51   | 40.8  |                |                | 0-12            | hospital                                      |
| Ali         | 2010 | 2009<br>-<br>2010 | Wasit    | Microscopy | 600  | 60   | 10    | 34<br>(56.67)  | 26<br>(43.33)  | 0-50            | hospital                                      |
| Ibrahim (a) | 2012 | 2010              | Baghdad  | Microscopy | 1520 | 149  | 9.80  | 91<br>(61.07)  | 58<br>(38.93)  | 0-12            | hospital                                      |
| Rahi (a)    | 2011 | 2009<br>-<br>2010 | Wasit    | Microscopy | 424  | 68   | 16.04 | 38<br>(55.88)  | 30<br>(44.12)  | 0-50            | hospital                                      |
| Rahi (b)    | 2011 |                   | Wasit    | Microscopy | 78   | 13   | 16.67 | 10<br>(76.92)  | 3<br>(23.08)   | 0-60            | hospital                                      |
| Raddam      | 2008 | 2006              | Thi-Qar  | Microscopy | 3600 | 1400 | 38.89 | 725<br>(51.79) | 675<br>(48.21) | 0-12            | hospital                                      |
| Kadum       | 2007 | 2005<br>-<br>2006 | Babylon  | Microscopy | 1312 | 228  | 17.38 |                |                | 1->50           | hospital<br>/<br>primary<br>schools<br>pupils |
| Al-Kubaisy  | 2007 | 2005<br>-<br>2006 | Karbala  | Microscopy | 2052 | 554  | 27    | 359<br>(64.80) | 195<br>(35.20) | various<br>ages | hospital                                      |
| Al-Jabouri  | 2007 | 2006<br>-<br>2007 | Karbala  | Microscopy | 557  | 286  | 51.35 | 157<br>(54.90) | 129<br>(45.10) | <1-70           | hospital                                      |

|               |      |                   |          |            |      |      |       |                 |                |          |          |
|---------------|------|-------------------|----------|------------|------|------|-------|-----------------|----------------|----------|----------|
| Al-Dulaimi    | 2007 | 2005              | Babylon  | Microscopy | 515  | 48   | 9.32  |                 |                | 1->30    | hospital |
| AL-Shaheen    | 2007 | 2005              | Basrah   | Microscopy | 7537 | 2203 | 29.23 | 1374<br>(62.37) | 829<br>(37.63) | 1->45    | hospital |
| Hamad         | 2011 | 1998<br>-<br>2004 | Erbil    | Microscopy | 5768 | 711  | 12.33 | 430<br>(60.48)  | 281<br>(39.52) |          | hospital |
| Jasim         | 2011 | 2009              | Baghdad  | Microscopy | 2177 | 377  | 17.32 | 206<br>(54.64)  | 171<br>(45.36) | Children | hospital |
| Ibrahim (b)   | 2012 | 2010              | Baghdad  | Microscopy | 223  | 43   | 19.28 |                 |                | 0-5      | hospital |
| Guirges       | 2006 |                   | Baghdad  | Microscopy | 3564 | 938  | 26.32 |                 |                | 0-70     | hospital |
| Al-Jebory     | 2012 | 2010<br>-<br>2011 | Saladin  | Microscopy | 1500 | 188  | 12.53 | 119<br>(63.30)  | 69<br>(36.70)  | 0-70     | hospital |
| Hussan        | 2012 |                   | Baghdad  | Microscopy | 250  | 22   | 8.8   |                 |                | <5       | hospital |
| Raof          | 2012 | 2009<br>-<br>2010 | Baghdad  | Microscopy | 300  | 67   | 22.33 | 41<br>(61.19)   | 26<br>(38.81)  | >1-<19   | hospital |
| Hussein       | 2013 | 2012<br>-<br>2013 | Al-Najaf | Microscopy | 678  | 162  | 23.89 |                 |                | 1-70     | hospital |
| Kadir         | 2013 | 2008<br>-<br>2009 | Kirkuk   | Microscopy | 600  | 154  | 25.67 |                 |                | <1-60    | hospital |
| Zaidan        | 2013 | 2005              | Baghdad  | Microscopy | 400  | 362  | 90.5  | 211<br>(58.29)  | 151<br>(41.71) | <5       | hospital |
| Al-Hameeda wi | 2014 | 2013              | Al-Najaf | PCR        | 104  | 25   | 24.04 |                 |                | 1-58     | hospital |
| Aljanabi      | 2014 | 2011<br>-<br>2012 | Baghdad  | Microscopy | 1712 | 270  | 15.77 | 169<br>(62.59)  | 101<br>(37.41) | 0-15     | hospital |
| Alshawi       | 2013 | 2010              | Baghdad  | Microscopy | 1356 | 331  | 24.41 | 186<br>(56.19)  | 145<br>(43.81) | 1->50    | hospital |

|             |      |                   |                                   |            |      |      |       |                 |                |       |                       |
|-------------|------|-------------------|-----------------------------------|------------|------|------|-------|-----------------|----------------|-------|-----------------------|
| Al-Bayati   | 2014 | 2011<br>-<br>2012 | Diwaniya                          | Microscopy | 1057 | 149  | 14.1  |                 |                | 0-12  | hospital              |
| Racine      | 2014 |                   | Diwaniya                          | Microscopy | 220  | 13   | 5.91  |                 |                | 15-45 | foodhandlers          |
| Hussein     | 2014 | 2011<br>-<br>2012 | Baghdad                           | Microscopy | 2449 | 453  | 18.5  |                 |                |       | hospital              |
| Abed        | 2015 | 2007              | Baghdad                           | Microscopy | 200  | 55   | 27.5  |                 |                | 0-10  | hospital              |
| Al-Garawi   | 2015 | 2013              | Karbala                           | Microscopy | 2036 | 410  | 20.14 | 253<br>(61.71)  | 157<br>(38.29) | <1-12 | hospital              |
| Obaid       | 2015 |                   | Kirkuk                            | Microscopy | 430  | 123  | 28.6  |                 |                | <1-12 | hospital              |
| Shaker      | 2016 | 2014              | Baghdad                           | Microscopy | 320  | 60   | 18.75 |                 |                | 1-50  | hospital              |
| Shlash      | 2016 | 2015<br>-<br>2016 | Al-Najaf                          | Microscopy | 120  | 90   | 75    | 32<br>(35.56)   | 58<br>(64.44)  | <6-14 | hospital              |
| Ali         | 2017 | 2013<br>-<br>2014 | Karbala,<br>Babylon<br>& Al-Najaf | Microscopy | 1350 | 203  | 15.04 |                 |                | 1->60 | hospital              |
| Al-Khalidi  | 2016 | 2014              | Diwaniya                          | PCR        | 170  | 39   | 22.94 |                 |                | 0-2   | hospital              |
| Atiyah      | 2016 | 2015              | Wasit                             | Microscopy | 3550 | 1780 | 50.14 | 1447<br>(81.29) | 333<br>(18.71) | 0-45  | hospital              |
| Hussein     | 2016 | 2008              | Thi-Qar                           | Microscopy | 780  | 49   | 6.28  |                 |                | 0-6   | hospital              |
| Al-Moussawi | 2005 | 2002<br>-<br>2003 | Babylon                           | Microscopy | 681  | 69   | 10.13 |                 |                | 1->30 | village               |
| Kadir       | 1999 | 1988<br>-<br>1989 | Kirkuk                            | Microscopy | 1681 | 130  | 7.73  |                 |                | 6-12  | primary school pupils |
| Al-Joudi    | 2005 | 1992<br>-<br>1997 | Al-Anbar                          | Microscopy | 6330 | 509  | 8.04  |                 |                | 1-67  | hospital              |
| Ali         | 2016 | 2014              | Sulaimani                         | Microscopy | 300  | 31   | 10.33 |                 |                | 0-14  | hospital              |

|            |      |                           |           |            |      |     |       |               |               |       |                                               |
|------------|------|---------------------------|-----------|------------|------|-----|-------|---------------|---------------|-------|-----------------------------------------------|
| Abid       | 2012 | 2009<br>-<br>2010         | Saladin   | Microscopy | 317  | 54  | 17.03 |               |               |       | hospital                                      |
| Badry      | 2014 | 2012<br>-<br>2013         | Duhok     | Microscopy | 522  | 134 | 25.67 |               |               | 0-14  | hospital                                      |
| Mero       | 2013 | 2008<br>-<br>2009         | Duhok     | Microscopy | 1132 | 121 | 10.69 |               |               | 0-13  | hospital<br>/<br>primary<br>schools<br>pupils |
| Al-Kubaisy | 2015 |                           | Baghdad   | Microscopy | 1500 | 351 | 23.4  |               |               | <10   | hospital                                      |
| Mahdi      | 2002 | 1997<br>-<br>1998<br>1999 | Basrah    | Microscopy | 215  | 5   | 2.33  | 2 (40)        | 3 (60)        | <6-65 |                                               |
| Shebib     | 2003 | 2000                      | Baghdad   | Microscopy | 200  | 50  | 25    |               |               |       | hospital                                      |
| Salman     | 2013 | 2010                      | Kirkuk    | Microscopy | 221  | 44  | 19.91 |               |               | <2    | hospital                                      |
| Al-Kaissi  | 2006 |                           | Baghdad   | Microscopy | 200  | 4   | 2     |               |               | 0-2   | hospital                                      |
| Amin       | 2015 | 2014                      | Sulaimani | Microscopy | 300  | 110 | 36.67 |               |               | 1-50  | hospital                                      |
| Obaid      | 2014 | 2013<br>-<br>2014         | Kirkuk    | Microscopy | 207  | 84  | 40.58 | 46<br>(54.76) | 38<br>(45.24) | <1-50 | hospital                                      |
| Mero       | 2015 | 2013<br>-<br>2014         | Duhok     | Microscopy | 600  | 158 | 26.33 |               |               | <2-12 | hospital<br>/<br>primary<br>schools<br>pupils |
| Al-Azawi   | 2009 | 2006<br>-<br>2007         | Baghdad   | Microscopy | 600  | 195 | 32.5  |               |               | 2-11  | hospital                                      |

|            |      |                   |         |            |      |     |       |               |               |             |                  |
|------------|------|-------------------|---------|------------|------|-----|-------|---------------|---------------|-------------|------------------|
| Al-Kubaisy | 2014 | 2003<br>-<br>2004 | Baghdad | Microscopy | 2033 | 105 | 5.16  |               |               | ≤15         | hospital         |
| Jarallah   | 2012 | 2011              | Basrah  | Microscopy | 294  | 80  | 27.21 | 47<br>(58.75) | 33<br>(41.25) | <1-14       | village          |
| Hussein    | 2015 | 2014<br>-<br>2015 | Baghdad | PCR        | 100  | 7   | 7     |               |               | 0-18        | hospital         |
| Hamad      | 2012 | 2010<br>-<br>2011 | Erbil   | Microscopy | 200  | 60  | 30    | 32<br>(53.33) | 28<br>(46.67) | <1-12       | hospital         |
| Faraj      | 2012 | 2005<br>-<br>2006 | Erbil   | Microscopy | 587  | 75  | 12.78 | 75<br>(100)   |               | ≥10-<br>>50 | foodhan<br>dlers |
| Salman     | 2016 | 2014<br>-<br>2015 | Kirkuk  | Microscopy | 417  | 7   | 1.68  |               |               | <1-60       |                  |

## Prevalence and heterogeneity

The random effect pooled prevalence of *E. histolytica/dispar* infection was 20.61% (95% CI: 17.83%–23.53%) in Iraq. The prevalence estimates of *E. histolytica/dispar* are shown in a forest plot (Fig 2). The results of Cochran's Q test and inverse variance index ( $I^2$ ) among studies included in the meta-analysis were 14169.34 and 99.31%, respectively.

## Fig 2. Forest plot of the proportion prevalence of *E. histolytica/dispar* in Iraq.

The pooled estimates by subgroup are summarised in Table 2. Of the 99 studies, 39 provided information on the gender of individuals investigated (38 studies presented data from both males and females, 1 study presented data from just males). The pooled prevalence of *E. histolytica/dispar* in males (58.43%, 95% CI: 54.71%–62.1%) was higher than in females (43.10%, 95% CI: 39.66%–46.6%).

**Table 2. Pooled prevalence of *E. histolytica/dispar* in Iraq stratified by subgroups**

| Characteristics                  |                                           | Number of studies | Proportion % | 95% CI          | heterogeneity |               |                  |                           |
|----------------------------------|-------------------------------------------|-------------------|--------------|-----------------|---------------|---------------|------------------|---------------------------|
|                                  |                                           |                   |              |                 | Q             | P-value       | I <sup>2</sup> % | 95% CI for I <sup>2</sup> |
| <b>Overall</b>                   |                                           | 99                | 20.61        | 17.83–<br>23.53 | 14169.34      | P <<br>0.0001 | 99.31            | 99.26<br>–<br>99.35       |
| <b>Sex</b>                       | <b>Male</b>                               | 39                | 58.43        | 54.71–<br>62.1  | 686.28        | P <<br>0.0001 | 94.46            | 93.24<br>–<br>95.47       |
|                                  | <b>Female</b>                             | 38                | 43.10        | 39.66–<br>46.6  | 568.85        | P <<br>0.0001 | 93.50            | 91.95<br>–<br>94.74       |
| <b>Detection method in stool</b> | <b>Microscopy</b>                         | 95                | 20.32        | 17.80–<br>22.96 | 10813.55      | P <<br>0.0001 | 99.13            | 99.07<br>–<br>99.19       |
|                                  | <b>PCR</b>                                | 3                 | 17.57        | 8.07–2<br>9.75  | 15.81         | P =<br>0.0004 | 87.35            | 64.15<br>–<br>95.53       |
| <b>Study setting</b>             | <b>hospitals</b>                          | 84                | 22.69        | 19.55–<br>25.99 | 12965.76      | P <<br>0.0001 | 99.36            | 99.32<br>–<br>99.40       |
|                                  | <b>hospitals / primary schools pupils</b> | 3                 | 17.66        | 10.34–<br>26.43 | 68.38         | P <<br>0.0001 | 97.08            | 94.14<br>–<br>98.54       |

|                      |                                                    |    |       |                 |         |               |       |                     |
|----------------------|----------------------------------------------------|----|-------|-----------------|---------|---------------|-------|---------------------|
|                      | <b>primary school pupils</b>                       | 3  | 9.68  | 7.17–1<br>2.52  | 8.89    | P =<br>0.0118 | 77.49 | 26.97<br>–<br>93.06 |
|                      | <b>foodhandlers</b>                                | 3  | 7.79  | 1.36–1<br>8.83  | 24.08   | P <<br>0.0001 | 95.85 | 88.14<br>–<br>98.55 |
|                      | <b>villages</b>                                    | 2  | 17.85 | 4.59–3<br>7.25  | 41.60   | P <<br>0.0001 | 97.60 | 94.09<br>–<br>99.02 |
|                      | <b>nursery schools / children from some houses</b> | 1  |       |                 |         |               |       |                     |
| <b>Year of study</b> | <b>&lt;1990</b>                                    | 1  |       |                 |         |               |       |                     |
|                      | <b>&gt;=1990–&lt;=1999</b>                         | 4  | 5.98  | 3.72–8.<br>73   | 25.73   | P <<br>0.0001 | 88.34 | 72.63<br>–<br>95.03 |
|                      | <b>&gt;=2000–&lt;=2009</b>                         | 46 | 26.68 | 22.12–<br>31.51 | 8143.53 | P <<br>0.0001 | 99.45 | 99.40<br>–<br>99.49 |
|                      | <b>&gt;=2010–&lt;=2017</b>                         | 38 | 18.46 | 14.28–<br>23.04 | 3758.65 | P <<br>0.0001 | 99.02 | 98.89<br>–<br>99.12 |
| <b>Province</b>      | <b>Al-Anbar</b>                                    | 2  | 16.15 | 2.72–3<br>7.73  | 200.94  | P <<br>0.0001 | 99.50 | 99.14<br>–<br>99.71 |



|  |                 |    |       |                 |         |               |       |                     |
|--|-----------------|----|-------|-----------------|---------|---------------|-------|---------------------|
|  | <b>Al-Najaf</b> | 5  | 26.80 | 11.96–<br>44.98 | 175.82  | P <<br>0.0001 | 97.73 | 96.39<br>–<br>98.56 |
|  | <b>Babylon</b>  | 12 | 15.98 | 13.24–<br>18.93 | 109.12  | P <<br>0.0001 | 89.92 | 84.33<br>–<br>93.52 |
|  | <b>Baghdad</b>  | 27 | 19.51 | 14.49–<br>25.07 | 2867.75 | P <<br>0.0001 | 99.09 | 98.96<br>–<br>99.21 |
|  | <b>Basrah</b>   | 3  | 17.29 | 4.43–3<br>6.19  | 142.09  | P <<br>0.0001 | 98.59 | 97.55<br>–<br>99.19 |
|  | <b>Diwaniya</b> | 4  | 13.08 | 7.46–1<br>9.97  | 25.59   | P <<br>0.0001 | 88.28 | 72.46<br>–<br>95.01 |
|  | <b>Diyala</b>   | 4  | 28.02 | 13.28–<br>45.72 | 361.20  | P <<br>0.0001 | 99.17 | 98.78<br>–<br>99.43 |
|  | <b>Duhok</b>    | 3  | 20.32 | 10.05–<br>33.07 | 92.35   | P <<br>0.0001 | 97.83 | 95.92<br>–<br>98.85 |
|  | <b>Erbil</b>    | 5  | 28.34 | 15.89–<br>42.76 | 287.69  | P <<br>0.0001 | 98.61 | 97.94<br>–<br>99.06 |

|  |                  |   |       |                 |         |               |       |                     |
|--|------------------|---|-------|-----------------|---------|---------------|-------|---------------------|
|  | <b>Karbala</b>   | 6 | 19.43 | 9.07–3<br>2.54  | 1121.22 | P <<br>0.0001 | 99.55 | 99.43<br>–<br>99.65 |
|  | <b>Kirkuk</b>    | 8 | 14.88 | 7.69–2<br>3.92  | 411.34  | P <<br>0.0001 | 98.30 | 97.66<br>–<br>98.76 |
|  | <b>Ninevah</b>   | 3 | 19.43 | 8.63–3<br>3.27  | 128.04  | P <<br>0.0001 | 98.44 | 97.23<br>–<br>99.12 |
|  | <b>Saladin</b>   | 6 | 27.33 | 14.91–<br>41.87 | 365.82  | P <<br>0.0001 | 98.63 | 98.06<br>–<br>99.04 |
|  | <b>Sulaimani</b> | 2 | 22.16 | 3.04–5<br>1.980 | 62.21   | P <<br>0.0001 | 98.39 | 96.43<br>–<br>99.28 |
|  | <b>Thi-Qar</b>   | 6 | 30.12 | 15.47–<br>47.22 | 1467.28 | P <<br>0.0001 | 99.66 | 99.58<br>–<br>99.73 |
|  | <b>Wasit</b>     | 5 | 20.92 | 5.71–4<br>2.370 | 756.71  | P <<br>0.0001 | 99.47 | 99.30<br>–<br>99.60 |

178

179

180

181

182

183

The proportion of *E. histolytica/dispar* infection was higher in studies used microscopic detection method (20.32%, 95% CI: 17.80%–22.96%) compared to studies used PCR method (17.57%, 95% CI: 8.07%–29.75%).

Most of the studies were hospital based studies reported a prevalence of *E. histolytica/dispar* of 22.69% (95% CI: 19.55%–25.99%). The estimated prevalence across the hospitals / primary schools pupils-based

184 studies was 17.66% (95% CI: 10.34%–26.43%). The pooled prevalence in primary school pupils and residents  
185 of villages was 9.68% (95% CI: 7.17%–12.52%) and 17.85% (95% CI: 4.59%–37.25%), respectively.  
186 Foodhandlers showed the lowest proportion of infection (7.79%, 95% CI: 1.36%–18.83%). There was one  
187 nursery schools / children from some houses-based study.

188 According to the subgroup of study year, there was one study conducted before 1990, the pooled  
189 prevalence was 5.98% (95% CI: 3.72%–8.73%) between 1990 and 1999, then increased into 26.68% (95%  
190 CI: 22.12%–31.51%) between 2000 and 2009, lastly, decreased into 18.46 (95% CI: 14.28%–23.04%)  
191 between 2010 and 2017.

192 On the basis of provinces, the highest pooled prevalence was observed in the province of Thi-Qar  
193 (30.12%, 95% CI: 15.47%–47.22%), while the lowest pooled prevalence was in the province of Diwaniya  
194 (13.08%, 95% CI: 7.46%–19.97%).

196 **Fig 3. Funnel plots of the proportion prevalence of *E. histolytica/dispar* in Iraq.**

## 198 Discussion

199 This the first systematic review and meta-analysis to estimate the nationwide prevalence of *E.*  
200 *histolytica/dispar* in Iraq. The findings of this study could have important implications to develop prevention  
201 and control strategies for amebiasis.

202 This study showed that the overall prevalence of *E. histolytica/dispar* in Iraq was 20.61%. The *E.*  
203 *histolytica/dispar* prevalence in Iraq is higher than that reported in the United States and Australia which were  
204 7% and 2.9% respectively [108,109]. The prevalence of *E. histolytica/dispar* in Iraq is closer to the prevalence  
205 of 23.1% in Pakistan [110] and 19.2% in United Arab Emirates [111], but lower than the estimated prevalence  
206 in two neighboring countries, Turkey and Iran which were 1.5% and 1.0% respectively [112,113].

207 The infection with *E. histolytica* is acquired through the ingestion of cysts from fecally contaminated  
208 food or water. Therefore in developing countries, *E. histolytica* is a waterborne and foodborne parasitic  
209 protozoa. In Iraq, the most probable sources of *E. histolytica* infection may be due to the contamination of  
210 different sources of drinking water with human sewages, as a result of direct dumping of untreated sewage

211 into rivers or leaking sewage pipes or septic tanks resulting in contaminated drinking water network and  
212 ground water. In Baghdad city, the capital of Iraq, the contamination proportion of tap water and sewage with  
213 *E. histolytica* were 10% and 30% respectively [114].

214 This meta-analysis showed that the infection rate was higher in males than females in Iraq. This finding  
215 is consistent with a previous study of gender distribution in which the reports of invasive amebiasis and  
216 population-based studies demonstrated a higher proportion of men than women, whereas asymptomatic  
217 infection with *E. histolytica* is equally distributed between males and females [115]. Another study indicated  
218 that serum from women had a higher ability to kill *E. histolytica* trophozoites than serum from men and this  
219 killing took place via complement [116].

220 In terms of detection method in stool, the pooled prevalence of microscopy was higher than that of  
221 PCR, because microscopic examination of stools does not distinguish *E. dispar* from *E. histolytica*. PCR  
222 methods are used to differentiate *E. histolytica* from *E. dispar*. Hence, PCR methods have led to more reliable  
223 results compared to microscopy.

224 In the present study, the maximum prevalence rate of 22.69% occurred in hospital based studies. The  
225 hospital setting cases may have intestinal symptoms and require clinical examination in the clinic or hospital  
226 to diagnose the causes of these symptoms, and they were routinely to be tested for intestinal parasites  
227 compared with cases from the community setting.

228 Residents of villages presented high prevalence of *E. histolytica* (17.85%). This may reflect the  
229 shortages of purified water supplies and compromised sanitation in the villages of Babylon and Basrah  
230 provinces where the samples of stools were taken and examined. The contamination of drinking water with *E.*  
231 *histolytica* was reported to be 8% in Basrah marshes villages, south of Iraq [117].

232 The prevalence of *E. histolytica* in primary school pupils was 9.68% and this is due to the lack of  
233 purified water supplies and poor hygiene in both schools and pupils. This can be explained by the fact that out  
234 of the three studies conducted only on primary schoolchildren, two studies were carried out among  
235 schoolchildren in rural areas [20,87] and one study with samples from rural and low socioeconomic urban  
236 areas [64].

237 Relatively the lowest prevalence (7.79%) has been observed among foodhandlers, this can be attributed  
238 to the routine mandatory screening and treatment of registered foodhandlers by the ministry of health.  
239 However, the prevalence of *E. histolytica* infection was much higher than in the neighboring countries Jordan  
240 and Turkey (0.11% and 0.3% respectively) [118,119].

241 The majority of included studies were published online after 2003 since there was no internet access  
242 before that in Iraq. The prevalence of *E. histolytica* increased from 5.98% in 1990–1999 to 26.68% in  
243 2000–2009. The small number of published researches in 1990–1999 could be the reason for the lower  
244 prevalence. The highest prevalence of *E. histolytica* was related to the years 2000–2009, this can be due to the  
245 sectarian violence during 2006-2008 in Iraq that led to the emigration and internal displacement of millions  
246 and this was associated with poor sanitation and limited access to health services. The overall prevalence *E.*  
247 *histolytica* in Iraq has reported a decrease (18.46%) in 2010–2017 compared to 26.68% in 2000–2009. This  
248 relative decrease could be an indicator of improvement in the sanitation and water supplies quality. In spite of  
249 that, this may suggest that *E. histolytica* is still considered as a health issue in Iraq.

250 The prevalence of *E. histolytica* varied among the provinces. The highest prevalence was observed in  
251 Thi-Qar province (30.12%). This may be because only individuals from hospitals were analyzed and this  
252 increased the rate of prevalence. The largest fraction of identified studies (27 of the 99 included studies) were  
253 carried out in Baghdad, the province with the highest density of population in Iraq and a population of more  
254 than 7 million, the estimated pooled prevalence of *E. histolytica* was 19.51%, this represents a challenge for  
255 health workers. The lowest pooled prevalence (13.08%) of *E. histolytica* in the country was reported from  
256 Diwaniya province. This may be because of the low number of studies from this province and the studies were  
257 conducted in individuals from hospitals (one of them used PCR for detection of *E. histolytica*) and  
258 foodhandlers, the group with the lowest rate of infection. Even if the disease is known to be prevalent to Iraq,  
259 no study was reported from provinces of Maysan and Muthanna in the south of Iraq.

260 There was high heterogeneity in prevalence infection with *E. histolytica* in Iraq among the included  
261 studies. This is revealing the variations that could have been due to population of the study, detection method,  
262 province and year of study.

263

## 264 Limitations

265 The study has some limitations. Most of the studies did not report the gender of the persons infected  
266 with *E. histolytica/dispar*, thus making it difficult to evaluate the effect of this important factor on the  
267 prevalence of infection with *E. histolytica/dispar* in Iraq. In addition, most surveys used microscopic  
268 diagnosis, which could not differentiate the pathogenic *E. histolytica* from the nonpathogenic *E. dispar* and  
269 these studies may have overestimated the rates of the prevalence. In this meta-analysis, there were few studies  
270 that assessed the prevalence of *E. histolytica/dispar* in community populations, most of the studies were  
271 hospital based which increased the risk of bias. Another limitation of this study is that all provinces of the  
272 country have not been covered in the eligible studies, therefore the pooled prevalence of two provinces have  
273 not been estimated and this could affect the overall pooled prevalence of infection with *E. histolytica/dispar*  
274 in Iraq.

275 In conclusion, the overall prevalence of infection with *E. histolytica/dispar* was 20.61% in the  
276 population of Iraq and the prevalence of the disease has dropped since 2010. Therefore, in order to reduce the  
277 infections of amebiasis in humans, preventive measures including educational programs, proper sanitation,  
278 monitoring of foodhandlers and preventing fecal contamination of water, vegetable and fruits should be  
279 recommended. Further studies are needed for the molecular diagnosis of intestinal *E. histolytica* to  
280 differentiate the pathogenic from nonpathogenic *Entamoeba* species. Also diagnosis of extraintestinal  
281 amebiasis in patients is required to estimate the epidemiology of the disease at a national level.

282

## 283 Reference

- 284 1. Marie C, Verkerke HP, Theodorescu D, Petri WA. A whole-genome RNAi screen uncovers a novel  
285 role for human potassium channels in cell killing by the parasite *Entamoeba histolytica*. *Sci Rep*.  
286 Nature Publishing Group; 2015;5: 1–18. doi:10.1038/srep13613
- 287 2. Stanley SL Jr. Amoebiasis. *Lancet*. 2003;361: 1025–1034. doi:10.1016/s0140-6736(03)12830-9
- 288 3. Blessmann J, Van LP, Nu PA, Thi HD, Muller-Myhsok B, Buss H, et al. Epidemiology of amebiasis  
289 in a region of high incidence of amebic liver abscess in central Vietnam. *Am J Trop Med Hyg*.  
290 2002;66: 578–583.

- 291 4. Walsh JA. Problems in recognition and diagnosis of amebiasis: estimation of the global magnitude of  
292 morbidity and mortality. Rev Infect Dis. 1986;8: 228–238. doi:10.1093/clinids/8.2.228
- 293 5. Salit IE, Khairnar K, Gough K, Pillai DR. A possible cluster of sexually transmitted *Entamoeba*  
294 *histolytica*: genetic analysis of a highly virulent strain. Clin Infect Dis. 2009;49: 346–353.  
295 doi:10.1086/600298
- 296 6. Nath J, Ghosh SK, Singha B, Paul J. Molecular epidemiology of amoebiasis: a cross-sectional study  
297 among North East Indian population. PLoS Negl Trop Dis. 2015;9: 1–19.  
298 doi:10.1371/journal.pntd.0004225
- 299 7. Moher D, Liberati A, Tetzlaff J, Altman DG, Altman D, Antes G, et al. Preferred reporting items for  
300 systematic reviews and meta-analyses: The PRISMA statement. PLoS Med. 2009;6.  
301 doi:10.1371/journal.pmed.1000097
- 302 8. Higgins JPT, Thompson SG, Deeks JJ, Altman DG. Measuring inconsistency in meta-analyses. BMJ  
303 Br Med J. 2003;327: 557–560. doi:10.1136/bmj.327.7414.557
- 304 9. Al-Sorchee SMA, Rabat AA, Juma IM. Microbial causatives of diarrhea in children in Erbil city. J  
305 Al-Nahrain Univ. 2013;16: 19–29.
- 306 10. Al-Mosawi R. Detection of intestinal parasitic among people infection with diarrhea in Al-Fhood  
307 district in Thi-Qar province, Iraq. Int J Sci Basic Appl Res. 2016;28: 180–185.
- 308 11. Amin HA, Ali SA. Evaluation of different techniques of stool examination for intestinal parasitic  
309 infections in Sulaimani city - Iraq. Int J Curr Microbiol Appl Sci. 2015;4: 991–996.
- 310 12. Salman YJ, Salih LA. Detection of some microbial infectious agents among children aging below two  
311 years in Kirkuk city. J Kirkuk Med Coll. 2013;1: 53–61.
- 312 13. Al-Kaissi EN, Makki M, Al-Khoja M. Aetiology and epidemiology of sever infantile diarrhoea in  
313 Baghdad, Iraq. Eur J Sci Res. 2006;14: 359–371.
- 314 14. Obaid HM. The effect of *Entamoeba histolytica* and *Giardia lamblia* infection on some human  
315 hematological parameters. J Nat Sci Res. 2014;4: 44–48.
- 316 15. Jarallah HM. Intestinal parasitic infections among rural villages in Basrah marshes regions. J Basrah  
317 Res. 2012;38: 40–43.

- 318 16. Al-Kubaisy W, Al-Talib H, Al-Khateeb A, Shanshal MM. Intestinal parasitic diarrhea among children  
319 in Baghdad - Iraq. Trop Biomed. 2014;31: 499–506.
- 320 17. Mero WMS, Jameel AY, Amidy KSK. Microorganisms and viruses causing diarrhea in infants and  
321 primary school children and their relation with age and sex in Zakho city, Kurdistan Region, Iraq. Int  
322 J Res Med Sci. 2015;3: 3266–3273. doi:<http://dx.doi.org/10.18203/2320-6012.ijrms20151174>
- 323 18. Al-Azawi AKA. Incidence of entamoebiasis among children in Abu-Ghraib area Baghdad. Iraqi J Vet  
324 Med. 2009;33: 155–160.
- 325 19. Saeed BH, Gazal FM, Nori HS. Epidemiological study of diarrhoea in Al-Rashedia village in Ninawa  
326 in Iraq. Rafidain J Sci. 2005;16: 191–206.
- 327 20. Abdullah IA, Al-Shirifi HM. The role of housing type and drinking water in prevalence of intestinal  
328 parasites among pupils of a number of primary schools in rural area of Al-Taamem Province-Iraq.  
329 Rafidain J Sci. 2005;16: 83–89.
- 330 21. Abdullah IA, Al-Shirifi HM. Prevalence of intestinal parasites amongst foodhandlers in Kirkuk city,  
331 Al-Taamem province, Iraq. Rafidain J Sci. 2005;16: 13–21.
- 332 22. Al-Taie HHI, Al-Mosa AHA. Prevalence rate of intestinal parasite associated with diarrhea. Al-  
333 Taqani. 2006;19: 134–141.
- 334 23. Al-Tikrity IAA, Al-Jubory AA, Al-Tikrity AHA. Prevalence of *Entamoeba histolytica* in Baiji  
335 province and the effect of *Punica granatum* rind extract on the parasite in culture. Tikrit J Pure Sci.  
336 2009;14: 189–196.
- 337 24. Al-Warid HS. Some factors influencing the prevalence of *Giardia lamblia* and *Entamoeba histolytica*  
338 in a sample of patients in north of Baghdad. J Al-Nahrain Univ. 2012;15: 121–125.
- 339 25. Jaaffer HS. Prevalence of *Giardia lamblia* and *Entamoeba histolytica/Entamoeba dispar* infections  
340 among Children in Al-Shulaa and Al-Khadimya-Baghdad-Iraq. J Univ Anbar Pure Sci. 2011;5: 6–10.
- 341 26. Sael YK. Prevalence of intestinal parasites in children in Baghdad city. Al-Taqani. 2009;22: A32–  
342 A37.
- 343 27. Al-Kaisi AAR. Intestinal parasitosis in Samarra'a city. Iraqi Postgrad Med J. 2007;6: 80–83.
- 344 28. Ftohe ZI, Al-Zako SS, Mahfoth N. Study on intestinal parasites as a causative of diarrhea and some



- 345 effectors on them in children of Neinavah governorate. Rafidain J Sci. 2008;19: 37–50.
- 346 29. Al-Marzoqi AHM, Kadhim RA. Parasitic etiology of newborn gastroenteritis in Babylon governorate.  
347 Med J Babylon. 2008;5: 501–506.
- 348 30. Nayyef HJ, Majeed LJ, Abdul Al-Wahab E. A study of epidemiology of intestinal protozoa in human  
349 in Baghdad city. J Al-Nahrain Univ - Sci. 2011;14: 57–63.
- 350 31. Al-Dulaimi FHA. Prevalence of infection with intestinal parasites in outpatients of two hospitals in  
351 Babylon province. Sci J Karbala Univ. 2007;5: 566–570.
- 352 32. Al-Mosa AHA, Al-Taie HHI. Effect of infection with intestinal parasites on blood picture. Al-Taqani.  
353 2007;20: 1–7.
- 354 33. Al-Jabouri DIA. Survey of intestinal parasites in some health centers in Karbala city. Sci J Karbala  
355 Univ. 2007;5: 80–86.
- 356 34. Jasim TM, Al-Mugdadi SFH. The incidence of *Entamoeba histolytica* & *Giardia lamblia* associated  
357 with diarrhea among children in Ibn Al-Balady hospital in Baghdad. Iraqi J Community Med.  
358 2011;24: 17–19.
- 359 35. Ibrahim BM. Isolation of some microbial agents that cause acute gastroenteritis in children. J Fac  
360 Med. 2012;54: 218–222.
- 361 36. Al-Kubaisy AHM, Ramadan M, Abdalsajad Q, Mahdi AH, Abdulmajeed MN, Alrushdi AAK. Survey  
362 of intestinal parasites which causing the diarrhea in Al-Heindia/Kerbala. Sci J Karbala Univ. 2007;5:  
363 6–10.
- 364 37. Kadum SA. Contamination role in the prevalence of intestinal parasites among the people of Al-Kufel  
365 town in Babylon province. Sci J Karbala Univ. 2007;5: 37–44.
- 366 38. Hamad NR, Ahmed RK. Intestinal parasites among patients attending general central public health  
367 laboratory in Erbil city-Iraq during 1998-2004. J Educ Sci. 2011;24: 79–86.
- 368 39. Al-Shaheen Z, Al-Maki AK, Hussein K. A study on prevalence of *Entamoeba histolytica* & *Giardia*  
369 *lamblia* infection among patient attending Qurna hospital in Basrah. Basrah J Vet Res. 2007;6: 30–36.
- 370 40. Kadhum IJ. Epidemiological study of acute diarrhea in breast fed infants. Kufa Med J. 2011;14: 76–  
371 80.

- 372 41. Raddam KK, Hasson AJ. The epidemiological aspects of infection with *Entamoeba histolytica* in  
373 acute diarrhea in Thi-Qar governorate during the year 2006. Kufa Med J. 2008;11: 15–24.
- 374 42. Ali MAK, Hameed SS, Kasim M. Prevalence of amoebic dysentery among population of Wasit  
375 province. Wasit J Sci Med. 2010;3: 87–91.
- 376 43. Al-Najar SA. The role of *Dientamoeba fragilis* in children with gastrointestinal illness. Iraqi Postgrad  
377 Med J. 2006;5: 42–45.
- 378 44. Al-Kubaisy AHM. Survey study of intestinal parasites in Awofy and Al-Twmazy area/Babylon  
379 province. Sci J Karbala Univ. 2008;6: 187–193.
- 380 45. Rahi AA, Mutlak EM. Prevalence of *Entamoeba histolytica* among population at Wasit province.  
381 Wasit J Sci Med. 2011;4: 54–57.
- 382 46. Rahi AA. Haematological variables of patients with amoebic dysentery. Wasit J Sci Med. 2011;4: 1–  
383 7.
- 384 47. Thhaib FN, Jeaz ET, Jaber SH. Study of role rotavirus and some pathogenic agents in diarrhea  
385 infections of the infants and children in Al-Diwaniya city. Al-Qadisiya J Pure Sci. 2008;13: 1–14.
- 386 48. Al-Reikaby RL, Abood MS, Hamid RG. The epidemiological investigation of the causatives of  
387 intestinal diseases in Al-Nasiriya city. J Univesity Thi-Qar. 2010;5: 128–137.
- 388 49. Al-Yasari HF, Hamza LF, Al-Hassnawi HH, Jabar SS. Isolation of some intestinal parasites from  
389 individuals suffering from intestinal disorders in Al-Mahaweel district. J Kerbala Univ. 2009;7: 212–  
390 218.
- 391 50. Ibrahim AQ. Prevalence of *Entamoeba histolytica* and *Giardia lamblia* in children in Kadhmiah  
392 hospital. Iraqi J Vet Med. 2012;36: 32–36.
- 393 51. Ibraheem MF, Ali ZA, Saeed DH. Shigella gastroenteritis in children with acute diarrhea in children  
394 welfare teaching hospital. Iraqi Postgrad Med J. 2010;9: 10–15.
- 395 52. Yousif A. The prevalence of some intestinal parasites in Al-Ubaidy region/Baghdad province. J Al-  
396 Qadisiyah Pure Sci. 2011;16: 16–19.
- 397 53. Ali FM, Ali SAK, Abdullah SJ. Detection of *Cyclospora cayetanensis* infections among diarrheal  
398 children attending pediatric teaching hospital in Sulaimani city. Int J Med Res Heal Sci. 2016;5: 77–

- 399 84.
- 400 54. Al-Morshidy KA. Prevalence of intestinal pathogenic parasites infections in Hilla city, Babylon  
401 province, Iraq. J Univ Babylon. 2007;14: 179–185.
- 402 55. Abid AM, Daoud IS, Al-Assie AH. Diagnostic study of some species of genus *Entamoeba* by PCR  
403 technique in city Tikrit. Second Scientific Conference – Science College – Tikrit University. 2012.  
404 pp. 96–100.
- 405 56. Badry AHH, Jameel AY, Mero WMS. Pathogenic microorganisms associated with diarrhea in infants  
406 and children in Duhok province, Kurdistan Region/Iraq. J Univ Zakho. 2014;2: 266–275.
- 407 57. Al-Joudi FS, Ghazal AM. The prevalence of intestinal parasites in Ramadi, Iraq. Bull Pharm Sci  
408 Assiut Univ. 2005;28: 277–281.
- 409 58. Shebib ZA, Abdul Ghani ZG, Mahdi LK. First report of *Escherichia coli* 0157 among Iraqi children.  
410 East Mediterr Heal J. 2003;9: 159–166.
- 411 59. Al-Kubaisy W, Al Badre A, Al-Naggat RA, Nik Ibrahim NS. Epidemiological study of bloody  
412 diarrhoea among children in Baghdad, Iraq. Int Arch Med. 2015;8: 1–9. doi:10.3823/1603
- 413 60. Mero WMS, Hussein JN. Prevalence of intestinal parasites among children in various localities of  
414 Duhok city and nearby villages. J Univ Zakho. 2013;1 (A): 189–199.
- 415 61. Mahdi NK, Ali NH. Intestinal parasites, including *Cryptosporidium* species, in Iraqi patients with  
416 sickle-cell anaemia. East Mediterr Heal J. 2002;8: 345–349.
- 417 62. Ali FS, Al-Kubaisy AHM. Molecular identification of *Entamoeba histolytica* parasite in the middle  
418 Euphrates region. J Univ Babylon. 2017;25: 57–68.
- 419 63. Al-Khalidi KAH. Detection of *Entamoeba histolytica* in patients an infected infants with diarrhea in  
420 born and children’s hospital by classic methods and real-time polymerase chain reaction. J Al-  
421 Qadisiyah Pure Sci. 2016;21: 27–35.
- 422 64. Kadir MA, Salman YG. Prevalence of intestinal parasites among primary school children in Al-  
423 Taameem province, Iraq. Ann Coll Med Mosul. 1999;25: 94–98.
- 424 65. Shlash SA. Impact of *Entamoeba histolytica* infection on some haematological and immunological  
425 parameters among children in Najaf governorate. Kufa J Nurs Sci. 2016;6: 102–110.

- 426 66. Al-Moussawi AM. Prevalence of intestinal parasites among rural population in Babylon province.  
427 Med J Babylon. 2005;2: 491–498.
- 428 67. Shaker MJ, Hussein RA. The relationship between the infection with *Entamoeba histolytica* and some  
429 blood parameters. Diyala J Pure Sci. 2016;12: 133–142.
- 430 68. Atiyah AH, Almwsawi HQH. The most detective protozoal infections in correlation with radiological  
431 findings in Wasit governorate hospitals during 2015. Med J Babylon. 2016;13: 862–873.
- 432 69. Hussein KR, Dahis HN, Mshhwt A-KA. Parasitic infections causing diarrhoea among children less  
433 than six years at Al-Nasiriyah province. J Thi-Qar Univ. 2016;11: 134–142.
- 434 70. Racine S. Epidemiology survey on the prevalence of infections intestinal parasites in workers in  
435 restaurants and food shop in the province of Diwaniyah. J Al-Qadisiyah Pure Sci. 2014;19: 33–39.
- 436 71. Alshawi A-RJ, Abbas NK, Al-Taie LHK. The prevalence of intestinal parasite among sample of Iraqi  
437 peoples in Baghdad city. Al-Yarmouk J. 2014; 103–116.
- 438 72. Al-Bayati MHJ, Al-Hassany NA-A. Epidemiological and diagnostic study for some intestinal  
439 parasites that infect children in Diwaniya province. J Al-Qadisiyah Pure Sci. 2014;19: 1–16.
- 440 73. Aljanabi MAH, Altikrity IAA. The spread of *Entamoeba histolytica* infection among children  
441 attended the central child hospital in Baghdad city. Iraqi J Sci. 2014;55: 979–985.
- 442 74. Obaid HM. Malnutrition in relation to some intestinal parasitic infection in children of Kirkuk city-  
443 Iraq. Kirkuk Univ J /Scientific Stud. 2015;10: 191–206.
- 444 75. Al-Garawi AKH. Study of prevalence of intestinal parasites infection among children in & attending  
445 to Karbala teaching hospital for children. J Kerbala Univ. 2015;13: 50–56.
- 446 76. Abed FA, Younis FN, Al-Naddawi MN. Prevalence and laboratory diagnosis of intestinal protozoa in  
447 children under 10 years (amoebiasis and giardiasis) in Al-Mansor general hospital for  
448 pediatric/Baghdad. J Biotechnol Res Cent. 2015;9: 17–20.
- 449 77. Raof SA. Prevalence of *Entamoeba histolytica*/*E. dispar* in three regions of south-east Baghdad. Al-  
450 Qadisiyah J Vet Med Sci. 2012;11: 8–14.
- 451 78. Hussein TA, Abdul-Jabbar DB. Epidemiological study for intestinal parasites in Abu Ghraib and  
452 Amiriyah regions. Iraqi J Vet Med. 2014;38: 19–26.

- 453 79. Al-Jebory AH, Al-Tikrity EAA, Al-Baitha SRH. Epidemiological study for intestinal protozoan  
454 parasites in Al-Tous province and study the histopathological effect on intestine of mice infected with  
455 *Giardia lamblia*. Tikrit J Pure Sci. 2012;17: 108–115.
- 456 80. Hussan BM. Determination of the prevalence of viral aetiology of diarrhea in children less than 5  
457 years of age in Baghdad province. Al-Qadisiah Med J. 2012;8: 163–176.
- 458 81. Guirges SY. Intestinal parasites in patients attending medical city teaching hospital in Baghdad. Al-  
459 Mustansiriyah J Sci. 2006;17: 1–10.
- 460 82. Al-Hameedawi JJY. Molecular identification of *Entamoeba histolytica* parasite by using actin and  
461 amebapore-A genes. Kufa J Nurs Sci. 2014;4: 48–55.
- 462 83. Hussein ZA, Hamady HM. Real-Time PCR for detection CP1 & CP5 virulence factors of *Entamoeba*  
463 *histolytica* in patients stool samples in Al-Najaf Al-Ashraf province. Kufa J Nurs Sci. 2013;3: 190–  
464 196.
- 465 84. Zaidan AA, Al Jiboory RK. Occurrence of amoebic versus bacillary dysentery among children under  
466 five years of age in Baghdad city. Al-Kindy Coll Med J. 2013;9: 35–39.
- 467 85. Al-Aboody BA. Epidemiological study on intestinal protozoa *Entamoeba histolytica* & *Giardia*  
468 *lamblia* in Al-Batha & Al-Gharraf cities of Thi-Qar governorate. J Thi-Qar Sci. 2010;2: 59–64.
- 469 86. Kadir MA, Daoud IS, Al-Bayati Z. Differentiation between *Entamoeba histolytica* and *E. dispar*  
470 using enzyme-linked immunosorbent assay and wet mount method. Tikrit J Pharm Sci. 2013;9: 122–  
471 129.
- 472 87. Al-Zigibi IMS. Isolation of parasitic causes of digestive system infection from primary rural school in  
473 a Reghala village in Babylon City. J Kerbala Univ. 2011;9: 170–174.
- 474 88. Al-Jeburi DIA. Epidemiology of intestinal parasites which causing the diarrhea in health center of  
475 Jidedat Al-Shat/Diala. J Kerbala Univ. 2010;8: 180–186.
- 476 89. Al-Tae A-RA, Al-Mufragi SE. Epidemiological study of the intestinal parasites in patients attending  
477 two hospitals in Baghdad. Tikrit Med J. 2008;14: 179–182.
- 478 90. Jasim TM. Bloody diarrhoea among children under five years of age in Tikirit teaching hospital. Al-  
479 Kindy Coll Med J. 2009;5: 78–82.

- 480 91. Al-Azzawi DSH. Prevalence of amoebic dysentery among children with diarrhea in Diyala  
481 governorate during 2009. Tikrit Med J. 2010;16: 60–66.
- 482 92. Al-Zigibi IMS, Abid-Alhasan MT, Al-Jubouri DIA. Study of the relationship between intestinal  
483 parasitic infection and the yeast infection with *Candida* in the digestive system of human in the  
484 Karbala governorate. J Kerbala Univ. 2011;9: 147–152.
- 485 93. Mohammed ZA. An epidemiological study of some intestinal parasitic infections of patients of Al-  
486 Hussein teaching hospital in the city of Nasiriyah. J Coll Educ Pure Sci. 2010;1: 153–146.
- 487 94. Muhsin ZA, Iliwii AA-K, Al-Quraishi MA. Prevalence and seasonal frequency and pattern of *Giardia*  
488 *lamblia* and *Entamoeba histolytica* infection in children. Al-Kufa Univ J Biol. 2016;8: 393–400.
- 489 95. Al-Ammash MSJ. Study on prevalence of *Entamoeba histolytica* & *Giardia lamblia* in Samarra city.  
490 Kufa J Vet Med Sci. 2015;6: 194–204.
- 491 96. Ali JK. Prevalence of *Entamoeba histolytica* and *Giardia lamblia* parasites among patients attending  
492 Al-Emam Ali hospital in Al-Mashrooh / Babylon province. Kufa J Vet Med Sci. 2015;6: 30–34.
- 493 97. Nasser NI. Frequency of parasitic, bacterial and fungal enteropathogens among children and adults  
494 patients with diarrhea and association affecting factors. Kufa J Nurs Sci. 2014;4: 169–175.
- 495 98. Jamil GH, Sulltan AA. Factors Affecting the epidemiology of the parasite *Entamoeba histolytica* and  
496 the parasite *Giardia lamblia* among residents of Al-Khalis and Baladruz districts. J Res Diyala  
497 Humanit. 2008;27: 98–106.
- 498 99. Salman YJ, Al-Taee A-RA, Abid AM. Prevalence of *Giardia lamblia* among Iraqi displaced peoples  
499 in Kirkuk province. Int J Curr Microbiol Appl Sci. 2016;5: 753–760.  
500 doi:10.20546/ijcmas.2016.501.076
- 501 100. Hamad NR, Ramzy IA. Epidemiology of *Entamoeba histolytica* among children in Erbil province,  
502 Kurdistan Region-Iraq. J Res Biol. 2012;2: 57–62.
- 503 101. Faraj AM, Koyee QM. Epidemiology of intestinal parasites among food handlers in Erbil city. Duhok  
504 Med J. 2012;6: 1–12.
- 505 102. Al-Fahdawi SS. Prevalence of intestinal parasites infection in some areas of Al-Quim / Al-Anbar  
506 governorate. J Univ Anbar pure Sci. 2007;1: 35–42.

- 507 103. Hussein RA, Shaker MJ, Majeed HA. Prevalence of intestinal parasitic infections among children in  
508 Baghdad city. J Coll Basic Educ. 2011;17: 139–147.
- 509 104. Mahfoth N. The distribution of parasitic intestinal infection and its relation with the type of food in  
510 the children of two nursery schools in Mosul city. Coll Basic Educ Res J. 2010;9: 493–512.
- 511 105. Hussein RA, Al-Mayah QS, Merdaw MA, Al-Bashier NT, Al-Abbas AA, Jasem IA. Evaluation of  
512 multiplex real-time PCR and ELISA in detection of intestinal protozoan parasites from children with  
513 diarrheal disease. Int J Adv Res. 2015;3: 782–788.
- 514 106. Rabatti AA, Rasheed NE. Etiology of bloody diarrhea among children admitted to maternity and  
515 children's hospital-Erbil. Al-Kindy Coll Med J. 2008;4: 19–24.
- 516 107. Khudair MK, Jawad SJ, Nazal MF. Study the causes of parasitic diarrhea in children in Al-Ahded  
517 village, Dyala governorate. Baghdad Sci J. 2011;8: 887–890.
- 518 108. Amin O. Seasonal prevalence of intestinal parasites in the United States during 2000. Am J Trop Med  
519 Hyg. 2002;66: 799–803.
- 520 109. Fotedar R, Stark D, Beebe N, Marriott D, Ellis J, Harkness J. PCR detection of *Entamoeba*  
521 *histolytica*, *Entamoeba dispar*, and *Entamoeba moshkovskii* in stool samples from Sydney, Australia.  
522 J Clin Microbiol. 2007;45: 1035–1037. doi:10.1128/JCM.02144-06
- 523 110. Zeb A, Qureshi A, Khan L, Mansoor A, Ullah S, Irfan M. Prevalence of *Entamoeba histolytica* in  
524 district Buner Khyber Pakhtunkhwa, Pakistan. J Entomol Zool Stud. 2018;6: 185–188.
- 525 111. ElBakri A, Samie A, Ezzedine S, Abu Odeh R. Differential detection of *Entamoeba histolytica*,  
526 *Entamoeba dispar* and *Entamoeba moshkovskii* in fecal samples by nested PCR in the United Arab  
527 Emirates (UAE). Acta Parasitol. 2013;58: 185–190. doi:10.2478/s11686-013-0128-8
- 528 112. Malatyali E, Ozcelik S, Celiksoz A. The investigation of *Entamoeba histolytica* prevalence in some  
529 villages of Sivas by ELISA method. Turkish J Parasitol. 2011;35: 6–9. doi:10.5152/tpd.2011.02
- 530 113. Sayyari A, Imanzadeh F, Bagheri Yazdi S, Karami H, Yaghoobi M. Prevalence of intestinal parasitic  
531 infections in the Islamic Republic of Iran. East Mediterr Heal J. 2005;11: 377–383.
- 532 114. Hadi A, Faraj A. Distribution of intestinal parasites in drinking water in some regions in Baghdad. Al-  
533 Qadisiyah J Vet Med Sci. 2008;7: 33–36.

- 534 115. Acuna-Soto R, Maguire JH, Wirth DF. Gender distribution in asymptomatic and invasive amebiasis.  
535 Am J Gastroenterol. 2000;95: 1277–1283. doi:10.1111/j.1572-0241.2000.01525.x
- 536 116. Snow M, Chen M, Guo J, Atkinson J, Stanley SL. Short report: differences in complement-mediated  
537 killing of *Entamoeba histolytica* between men and women - an explanation for the increased  
538 susceptibility of men to invasive amebiasis? Am J Trop Med Hyg. 2008;78: 922–923.
- 539 117. Jarallah HM. Contamination of different drinking water sources with parasites in Basrah marshes  
540 villages, Iraq. J Babylon Univ Appl Sci. 2016;24: 370–376.
- 541 118. Abdel-Dayem M, Al Zou'bi R, Hani RB, Amr ZS. Microbiological and parasitological investigation  
542 among food handlers in hotels in the Dead Sea area, Jordan. J Microbiol Immunol Infect. Elsevier  
543 Taiwan LLC; 2014;47: 377–380. doi:10.1016/j.jmii.2013.06.001
- 544 119. Simsek Z, Koruk I, Copur AC, Gürses G. Prevalence of *Staphylococcus aureus* and intestinal  
545 parasites among food handlers in Sanliurfa, Southeastern Anatolia. J Public Heal Manag Pract.  
546 2009;15: 518–523. doi:10.1097/PHH.0b013e3181aa2814

547  
548 **Supporting information**

549 **S1 Checklist. PRISMA checklist.** PRISMA guideline (Preferred Reporting Items for Systematic Reviews  
550 and Meta-Analyses).

551 **S1 Diagram. PRISMA flow diagram.** Flow diagram of study selection process for systematic review and  
552 meta-analysis.



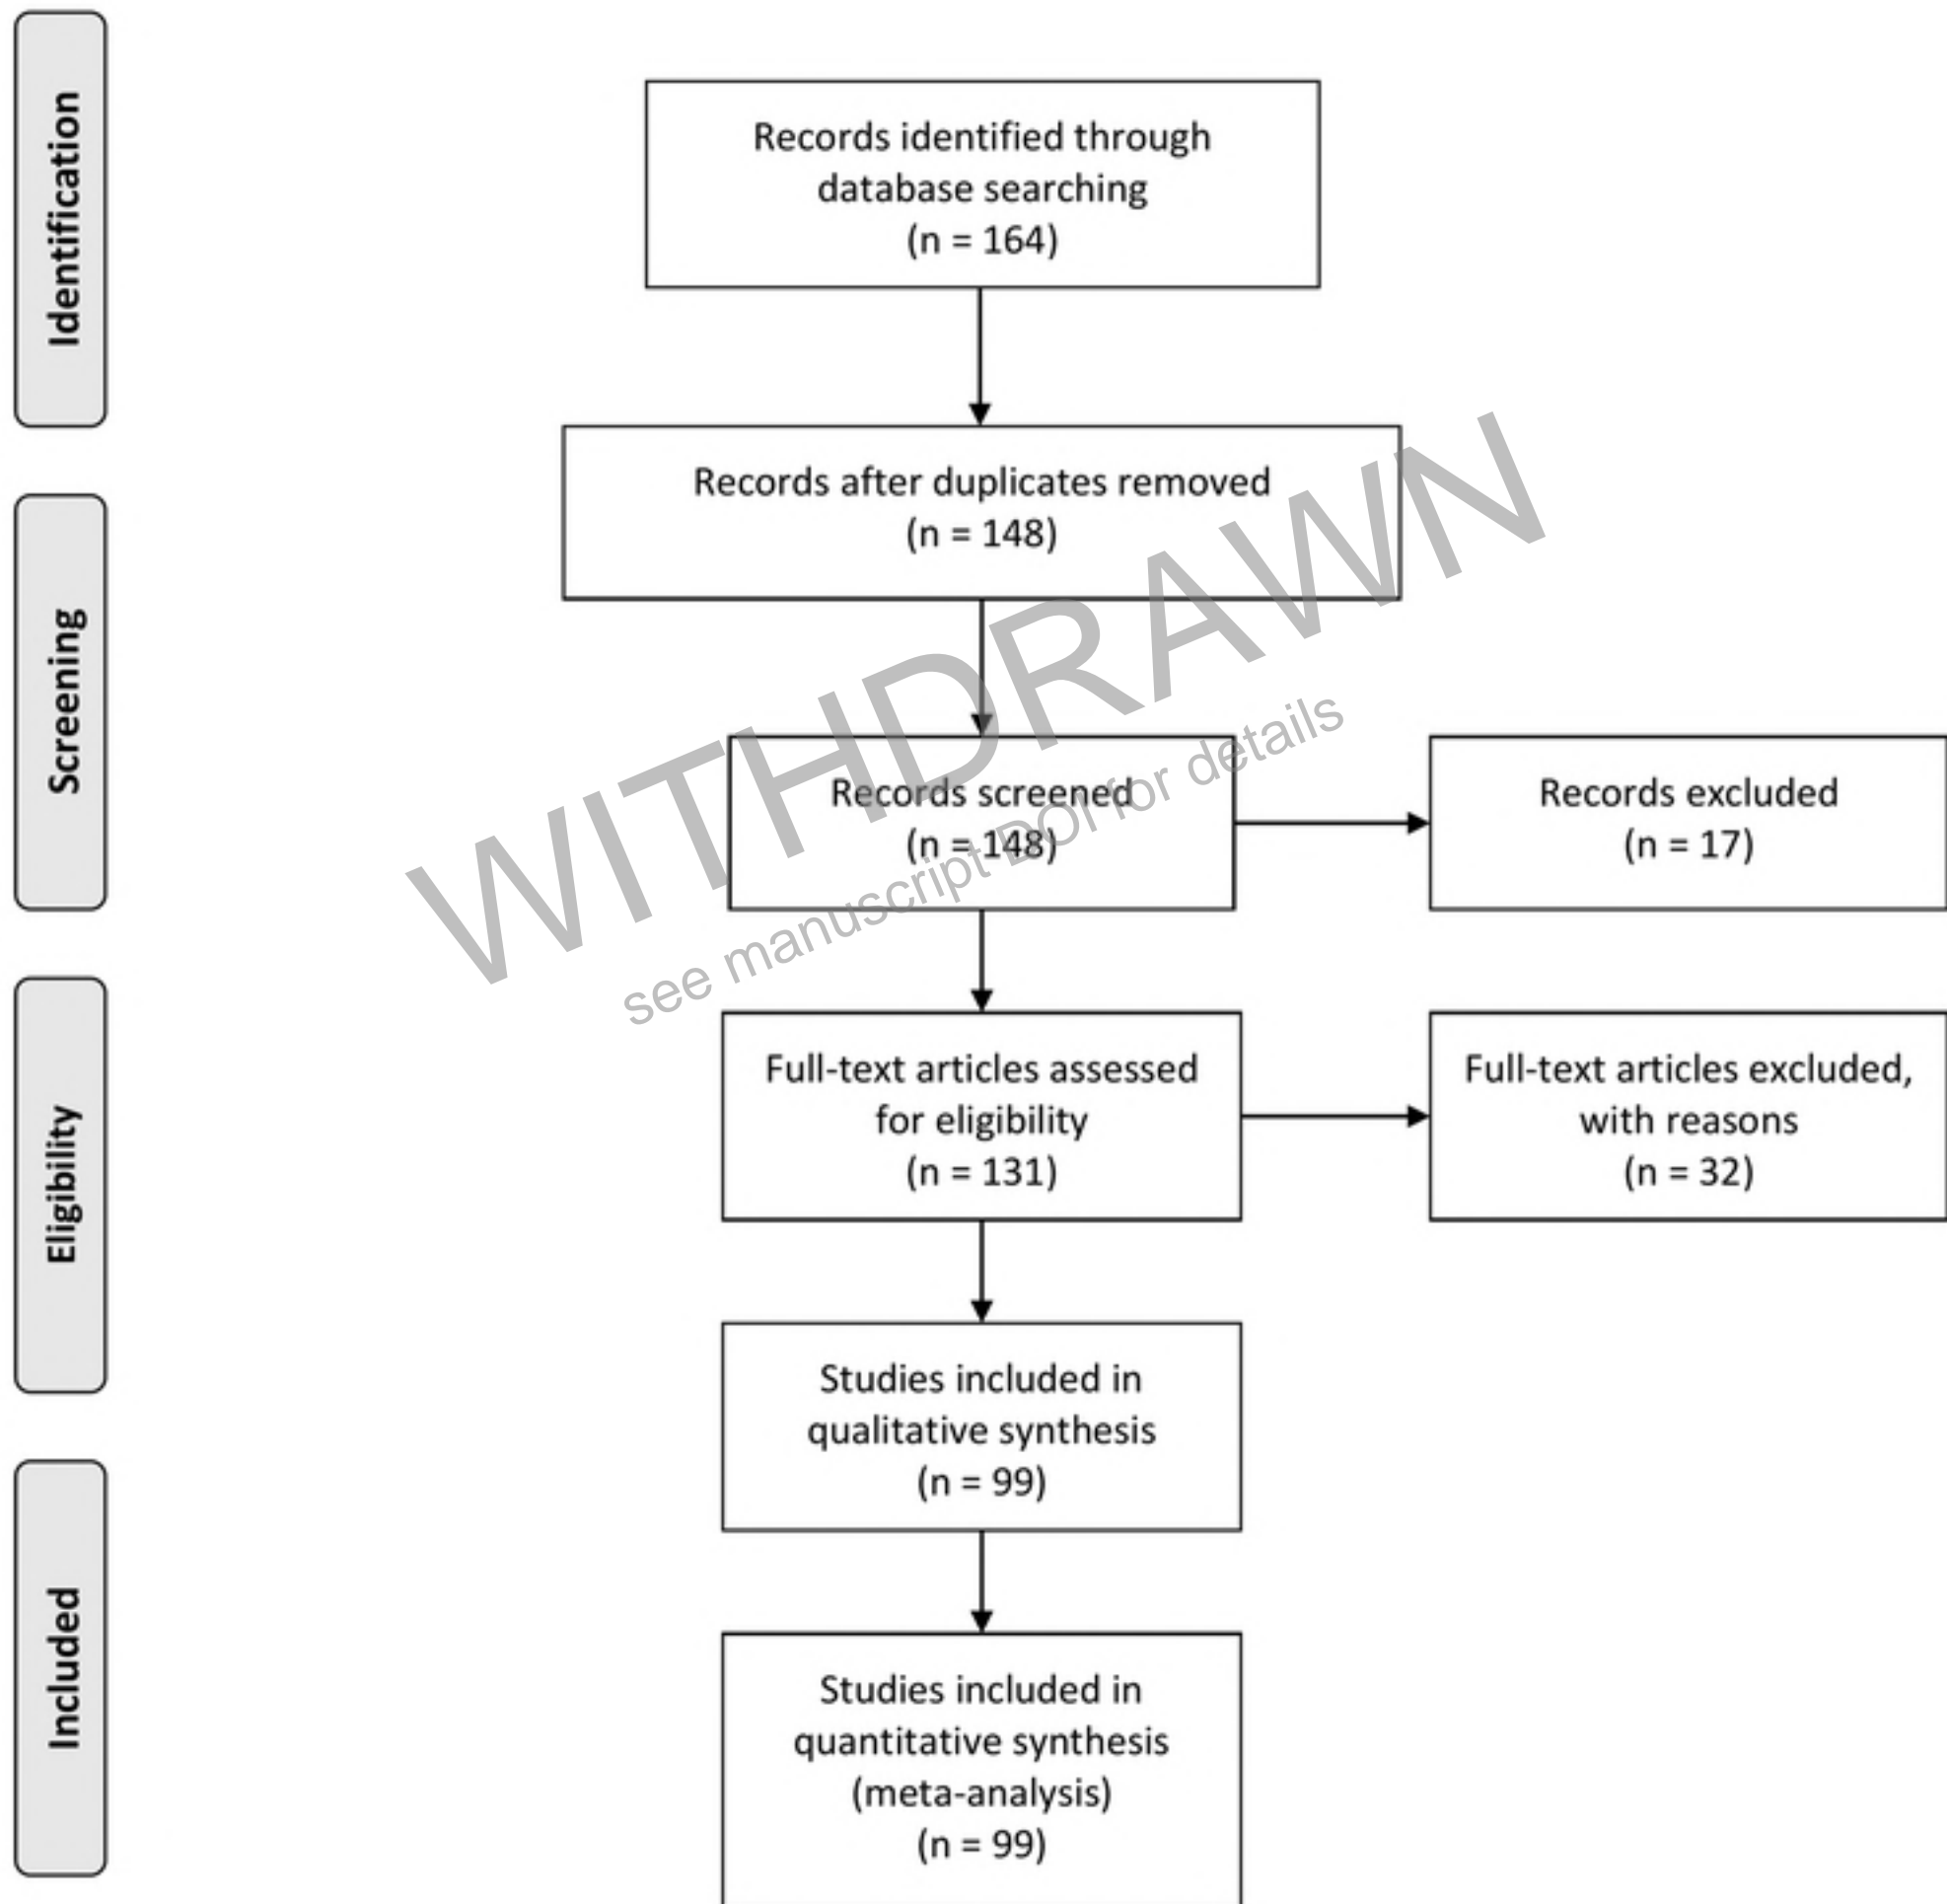

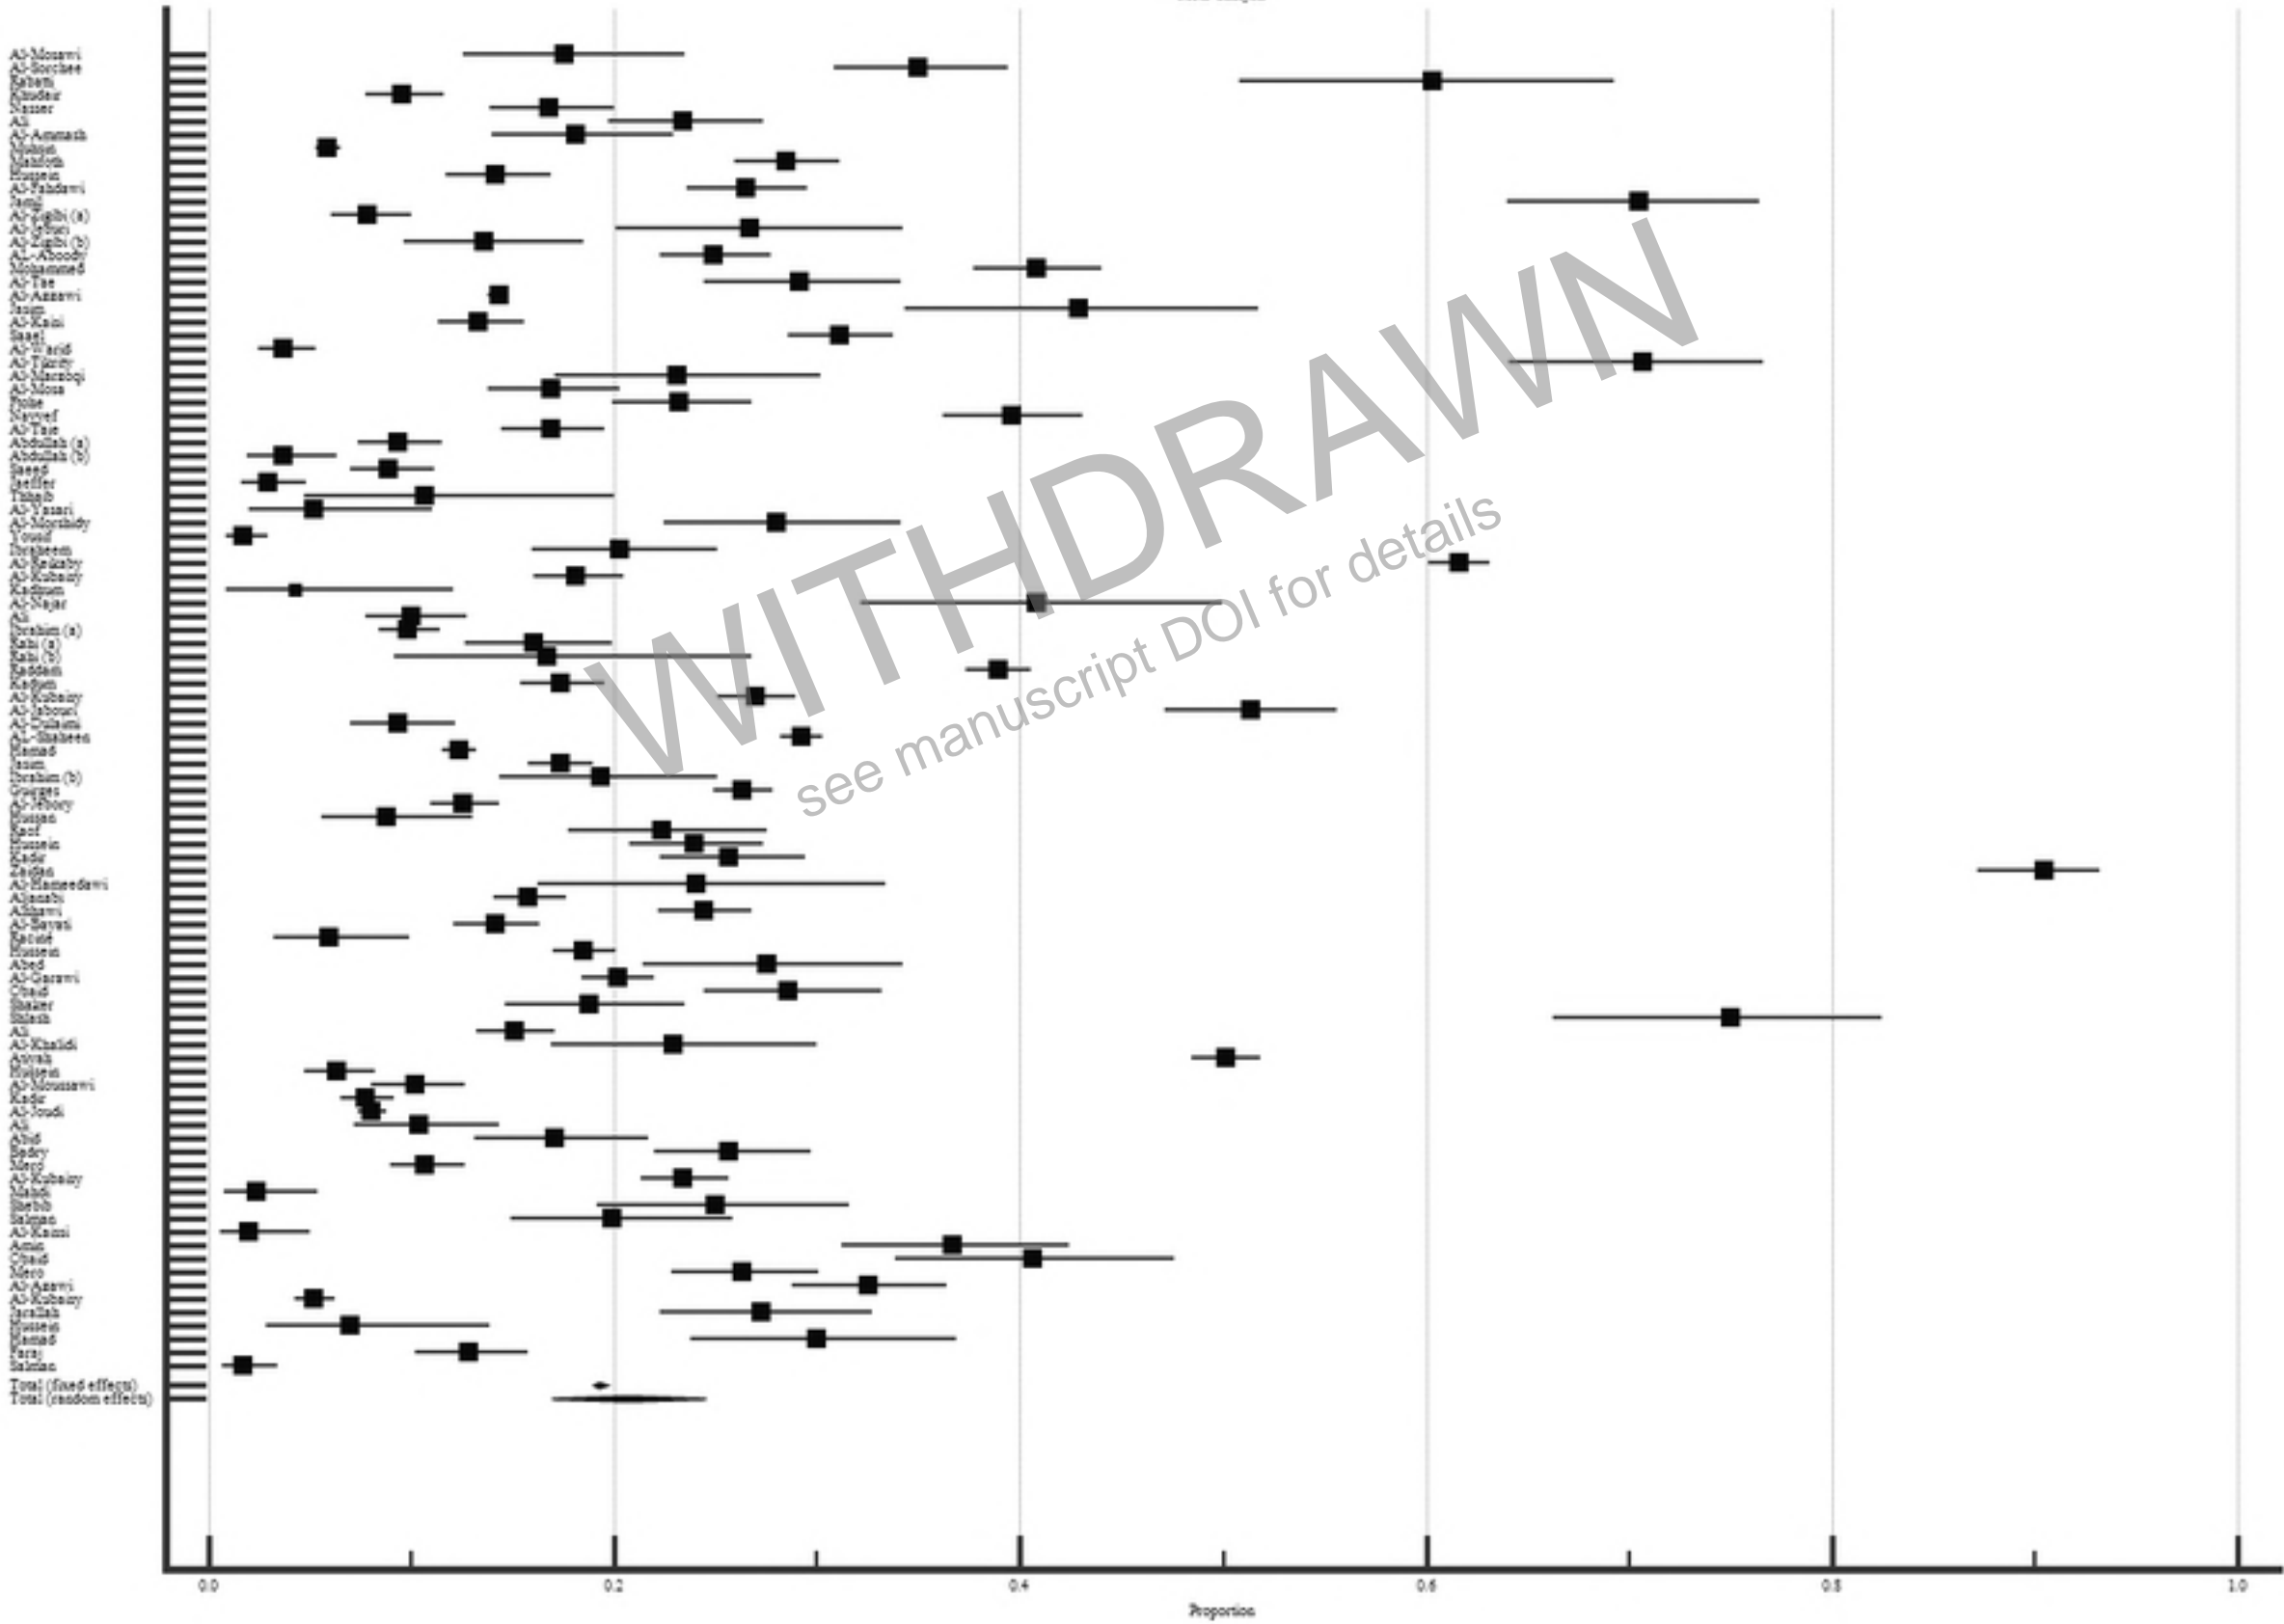

WITHDRAWN  
see manuscript DOI for details

# Meta-analysis

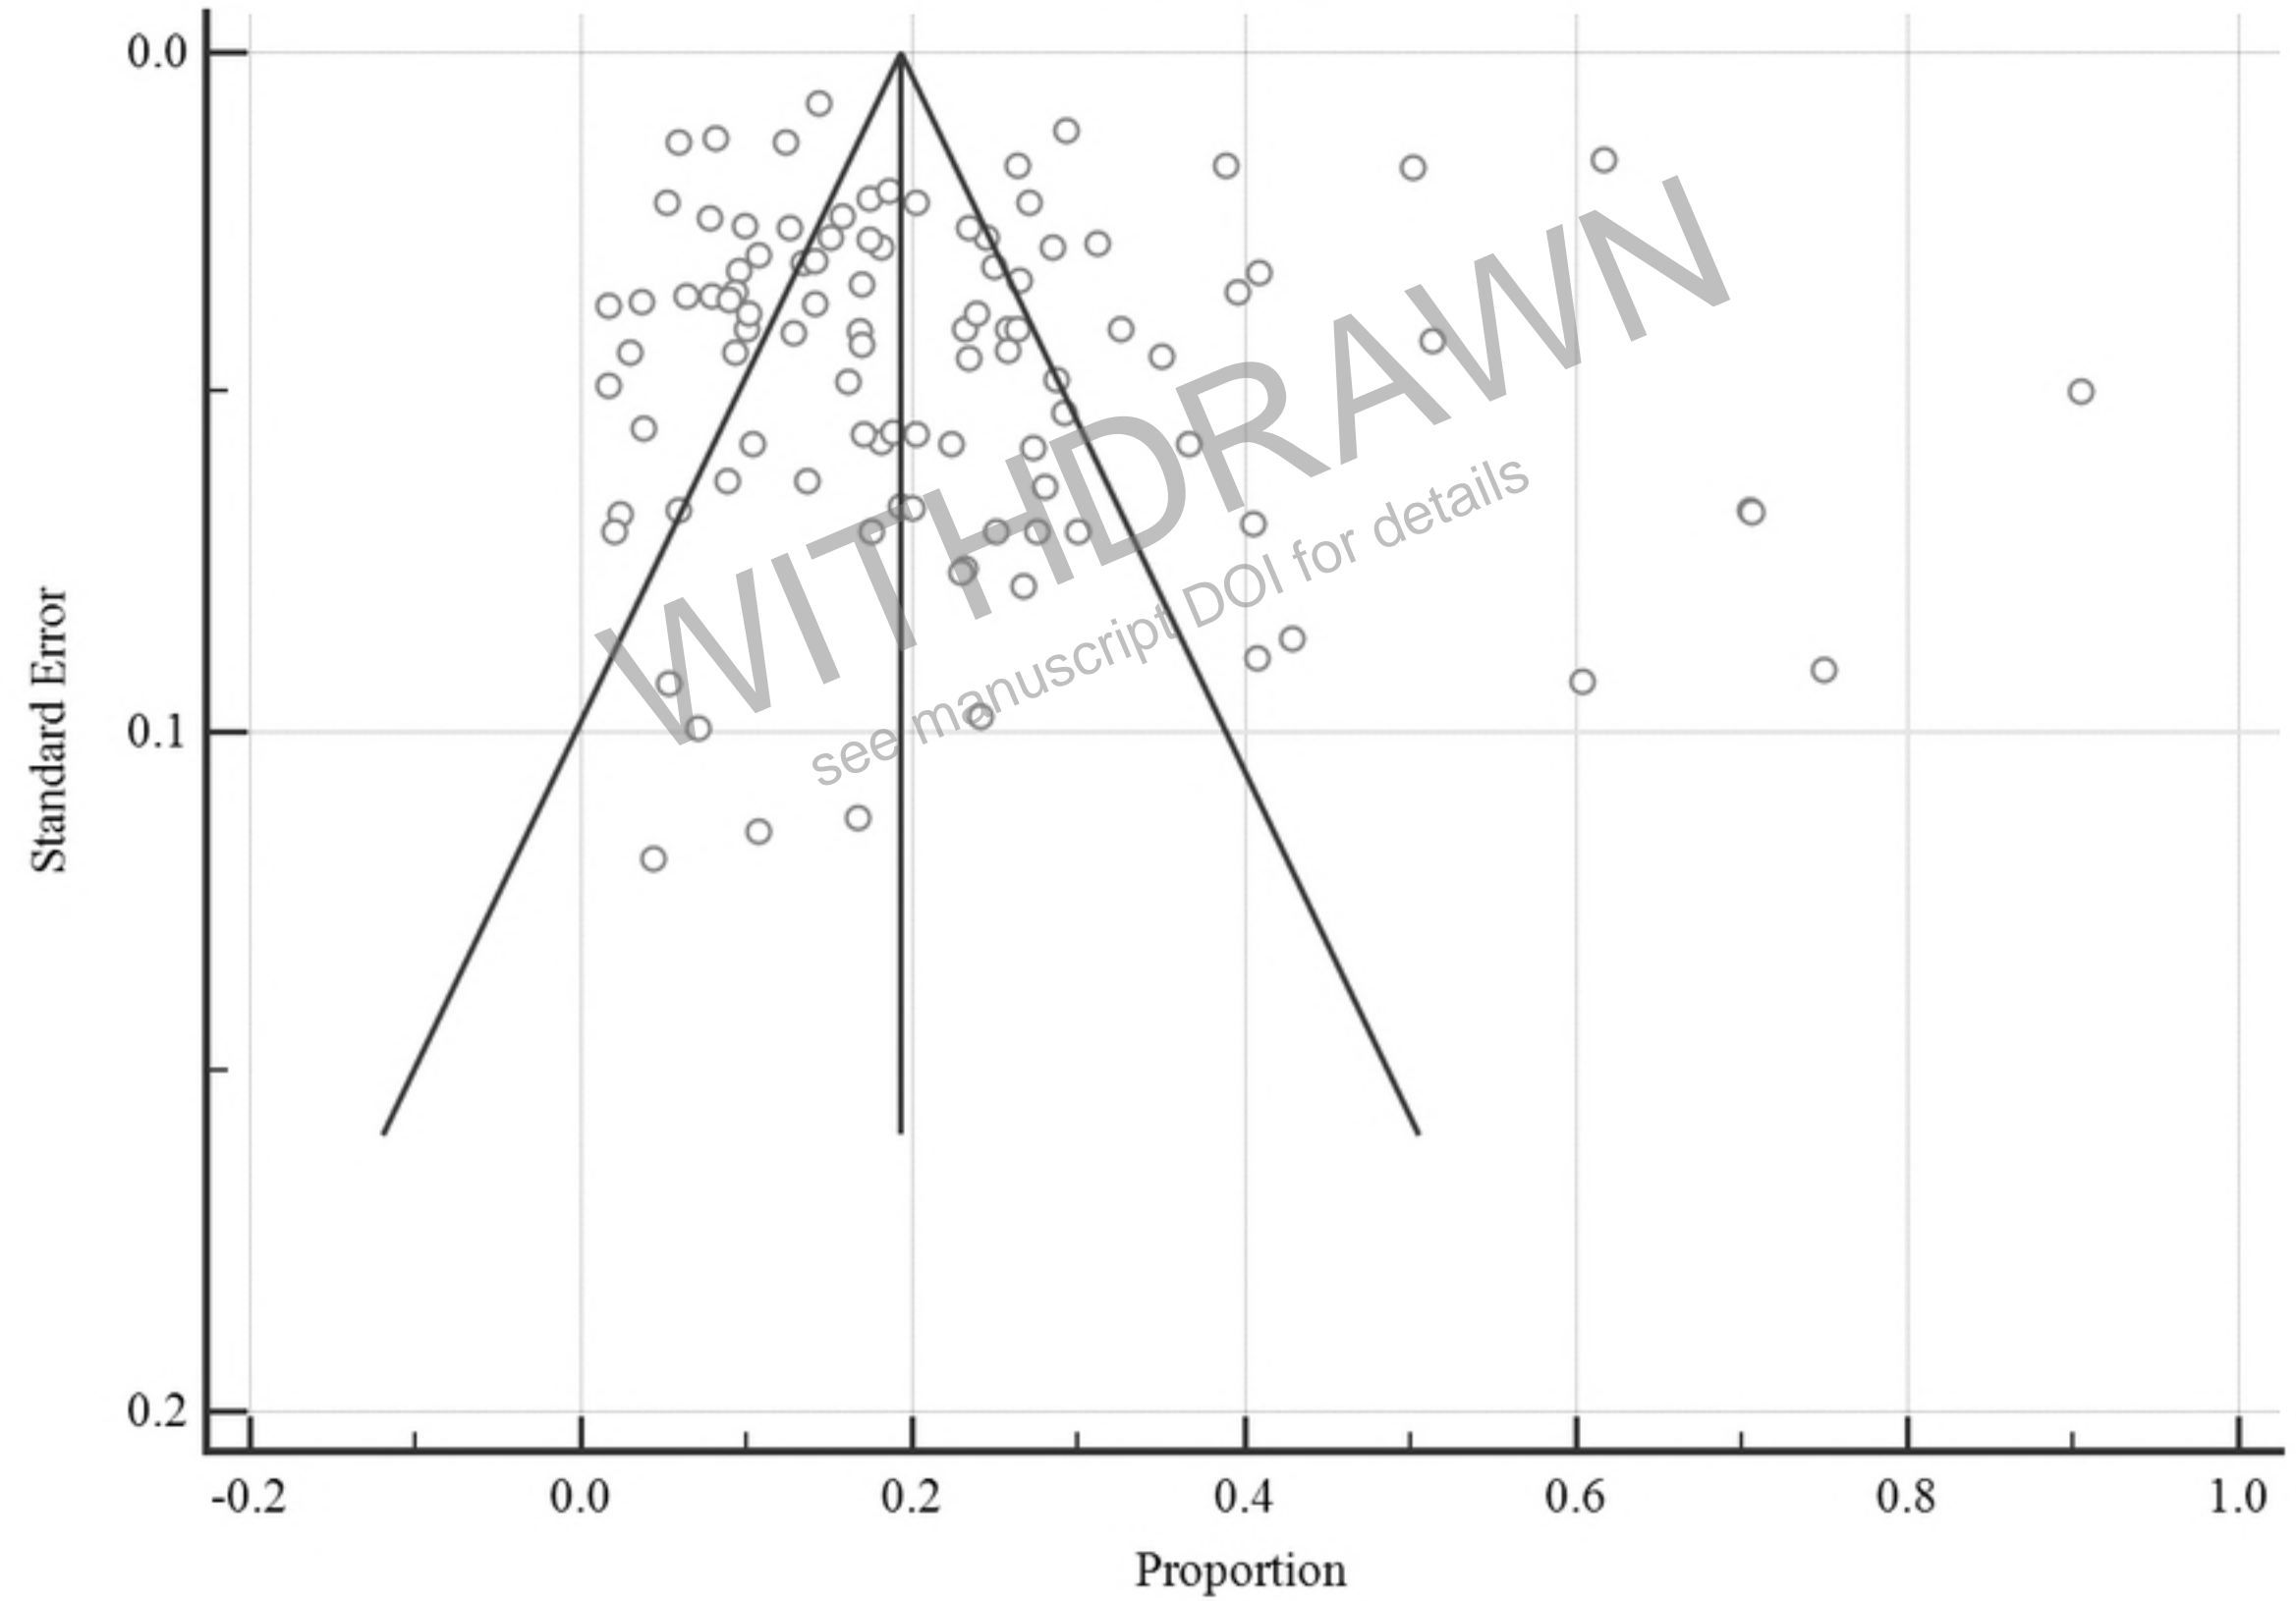

Source: http://biorxiv.org/content/10.1101/435495v1.full.pdf
